# Supplementary material
Source: PubMed Central journal article supplement (PMC2750869)
Supplement: NIHMS91210-supplement-2_si_002.pdf [file NIHMS91210-supplement-2_si_002.pdf]

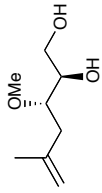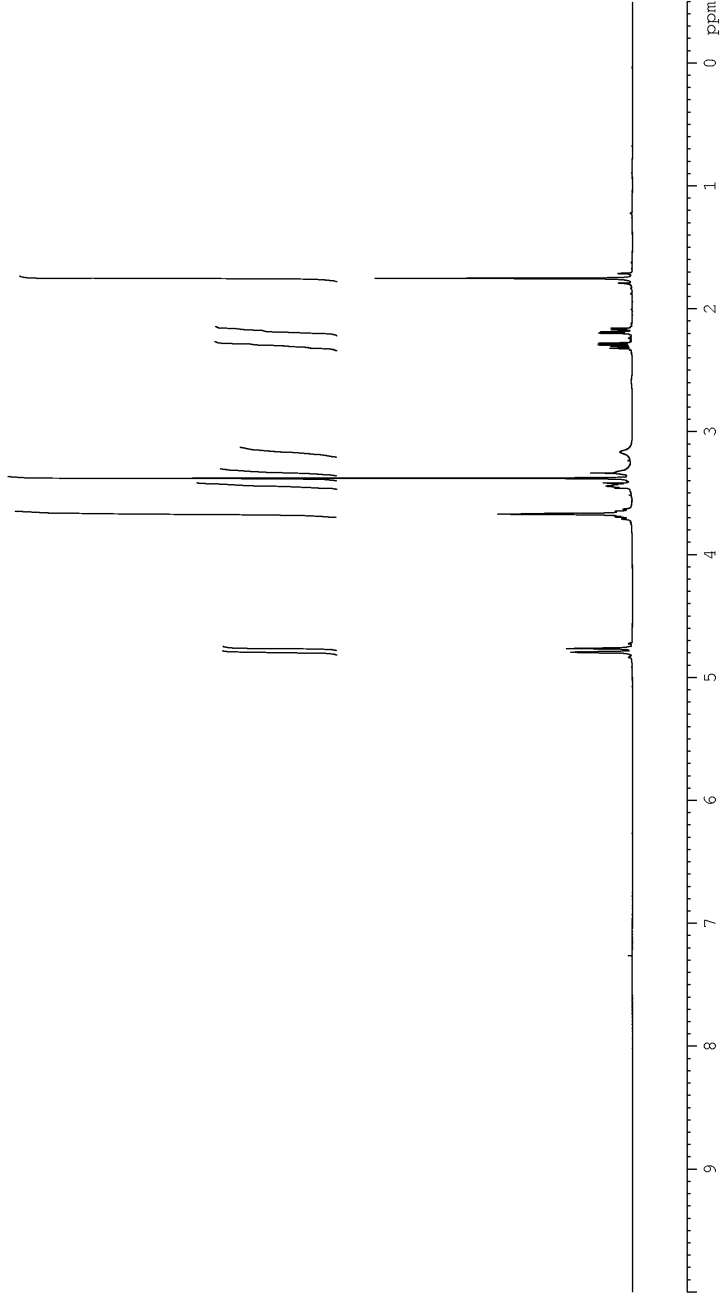

**Figure 1.** The <sup>1</sup>H NMR Spectrum of Compound (+)-**5I** in CDCl<sub>3</sub>

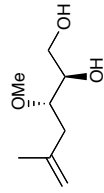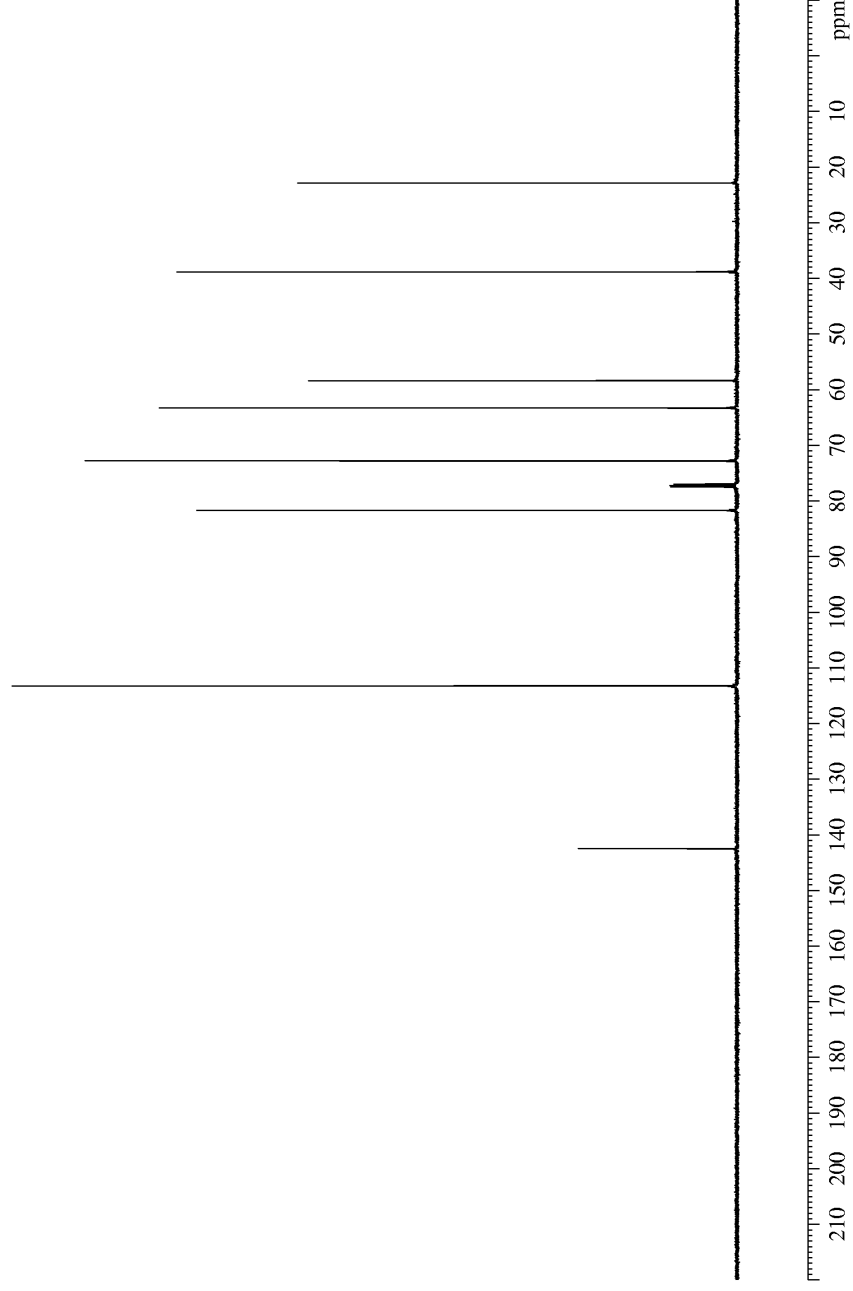

**Figure 2.** The  $^{13}\text{C}$  NMR Spectrum of Compound (+)-S1 in  $\text{CDCl}_3$

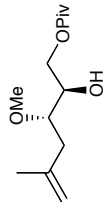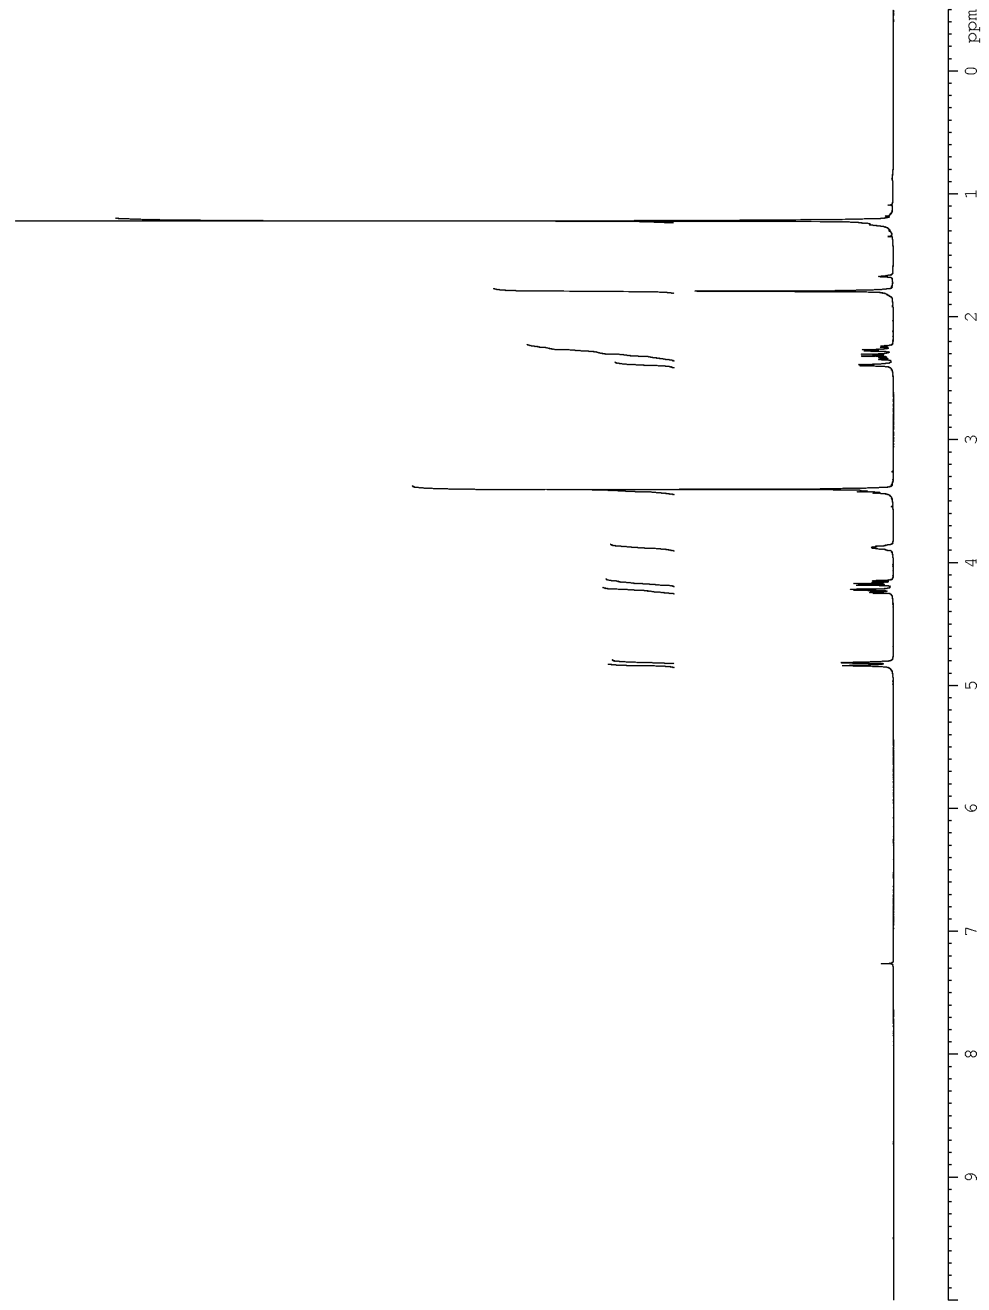

**Figure 3.** The <sup>1</sup>H NMR Spectrum of Compound (+)-11 in CDCl<sub>3</sub>

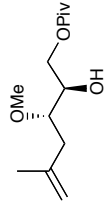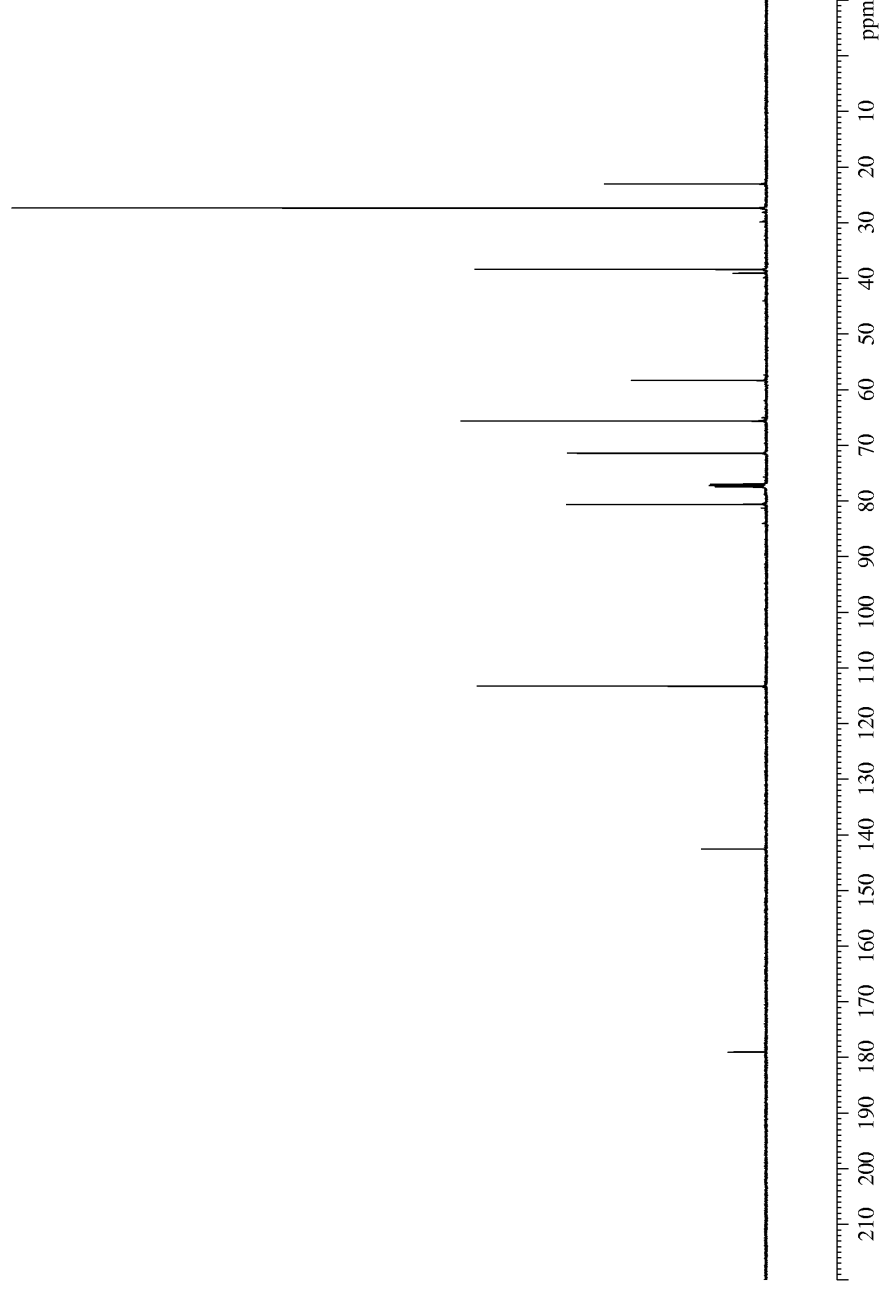

**Figure 4.** The  $^{13}\text{C}$  NMR Spectrum of Compound (+)-11 in  $\text{CDCl}_3$

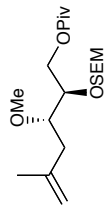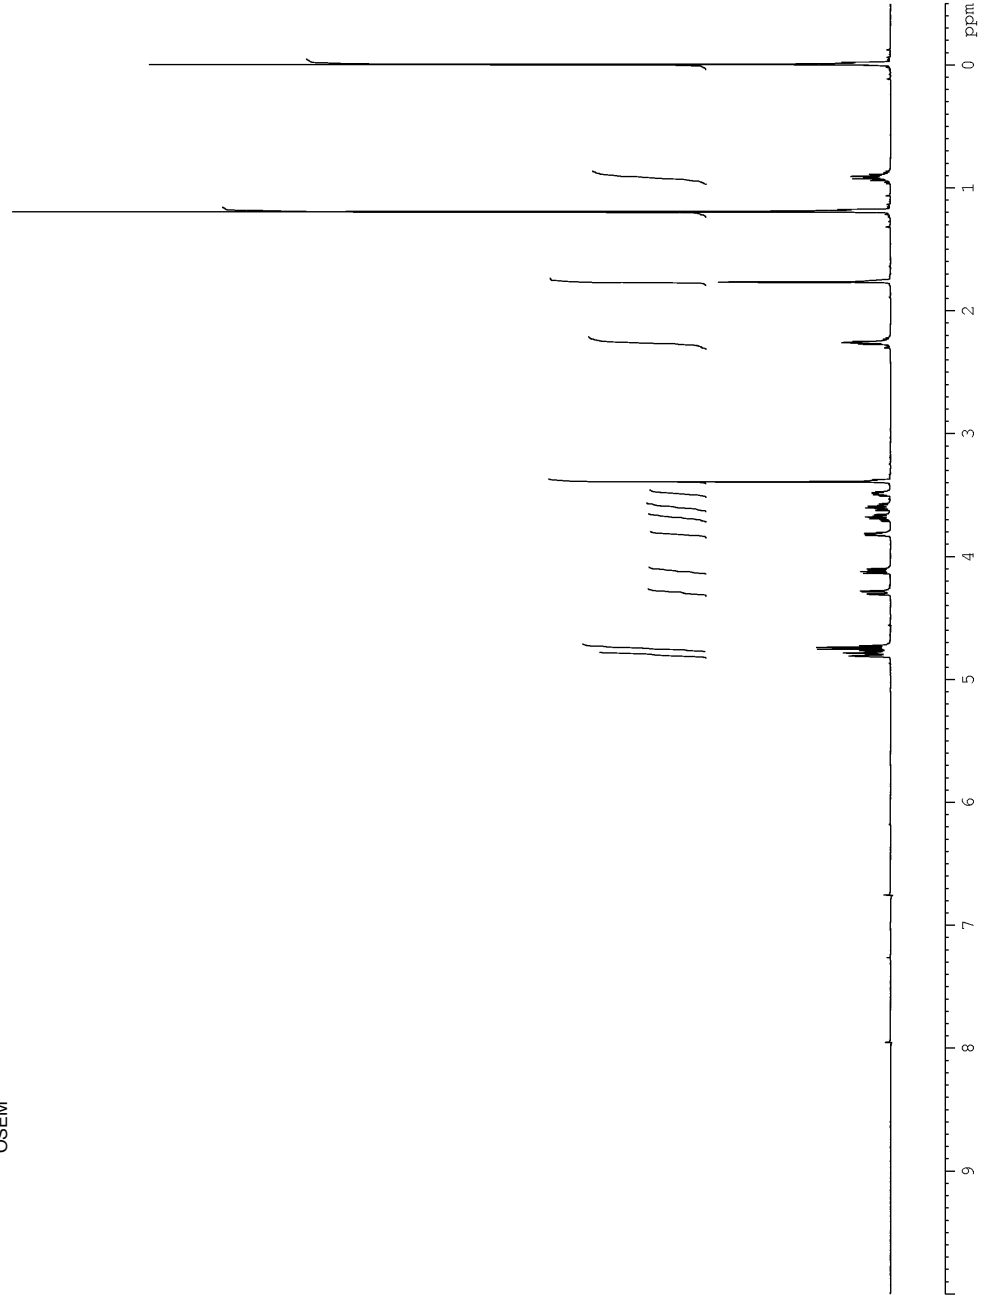

**Figure 5.** The <sup>1</sup>H NMR Spectrum of Compound (-)-S2 in CDCl<sub>3</sub>

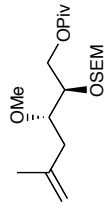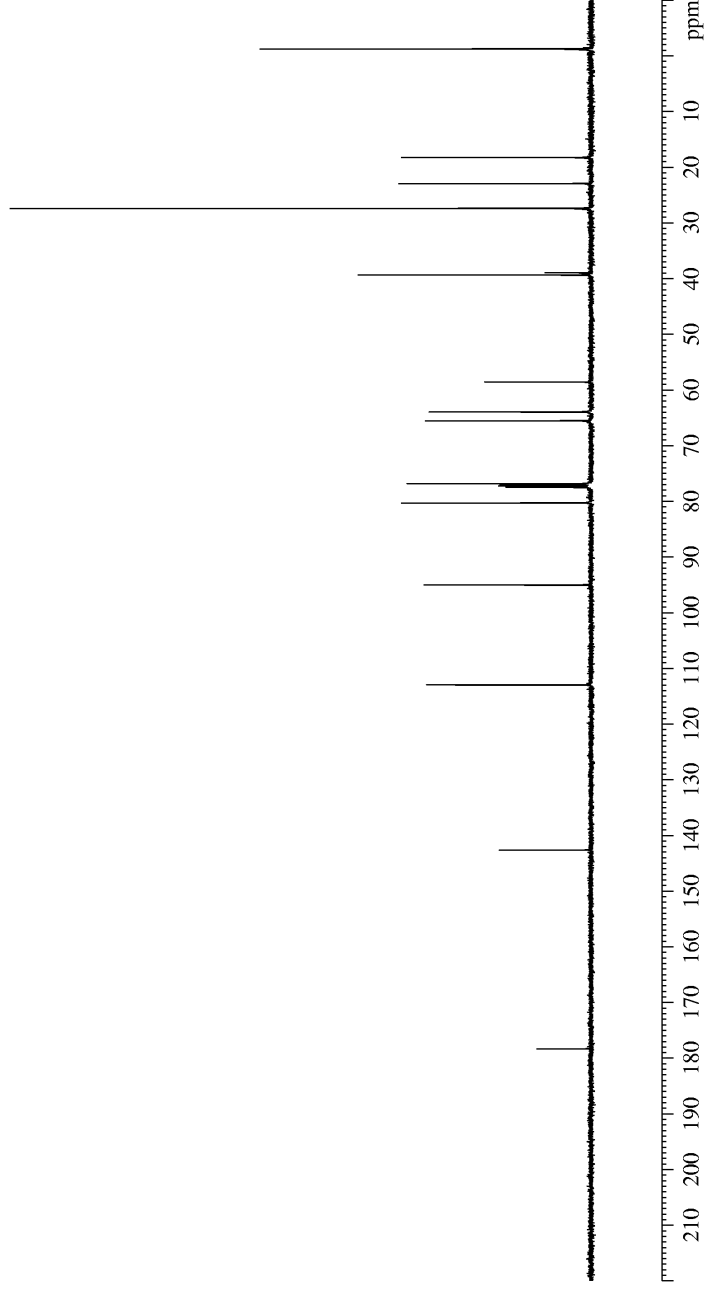

**Figure 6.** The  $^{13}\text{C}$  NMR Spectrum of Compound (-)-S2 in  $\text{CDCl}_3$

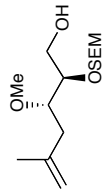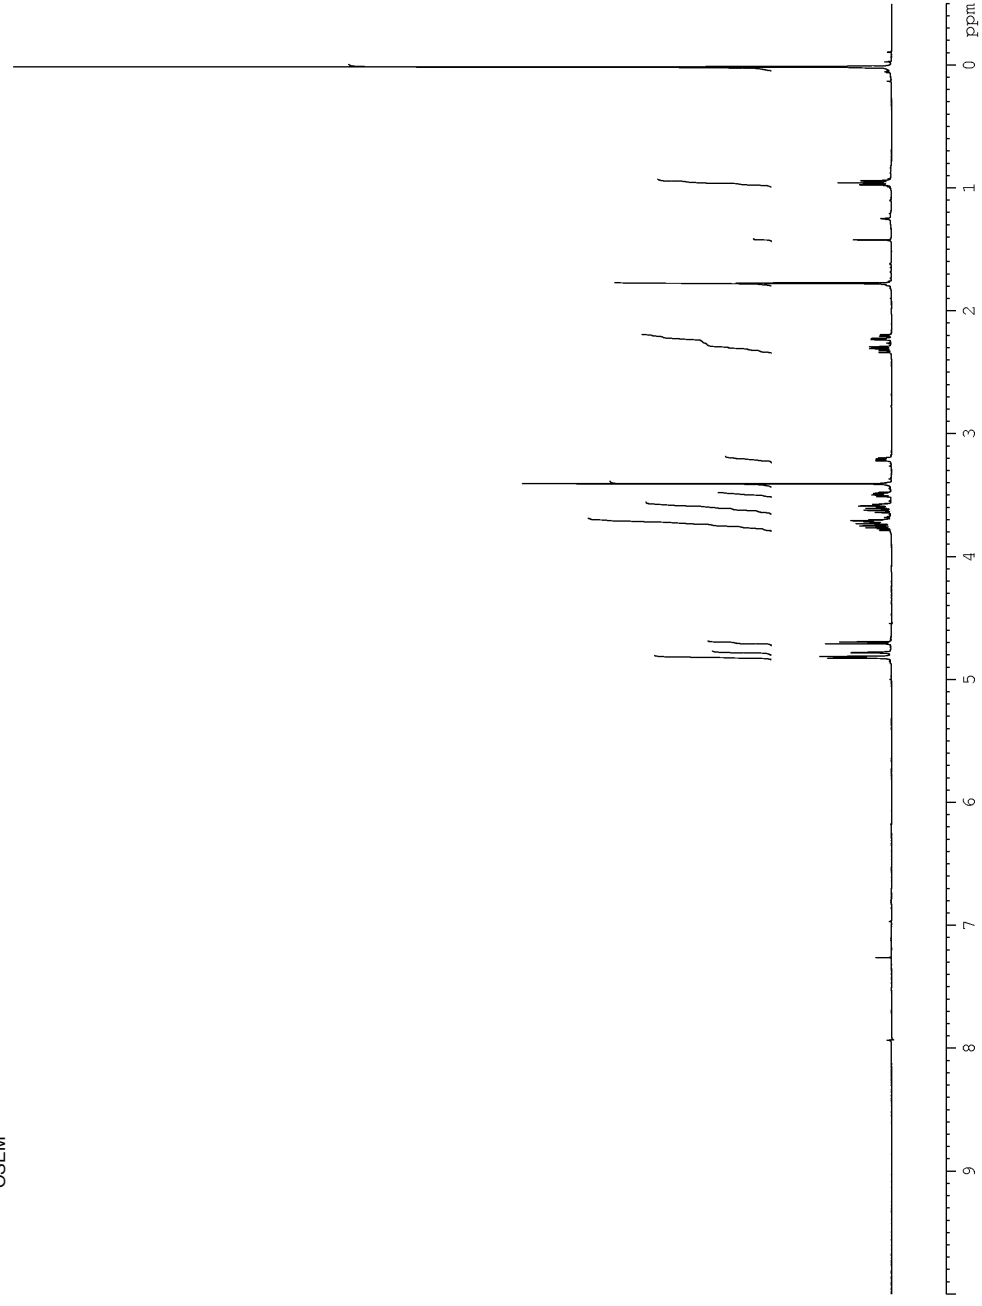

**Figure 7.** The <sup>1</sup>H NMR Spectrum of Compound (+)-12 in CDCl<sub>3</sub>

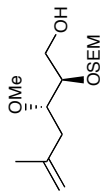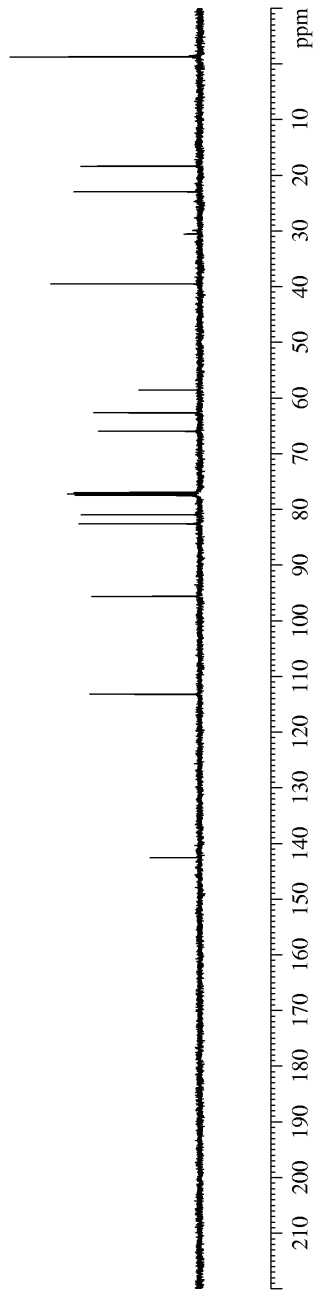

**Figure 8.** The <sup>13</sup>C NMR Spectrum of Compound (+)-12 in CDCl<sub>3</sub>



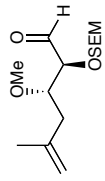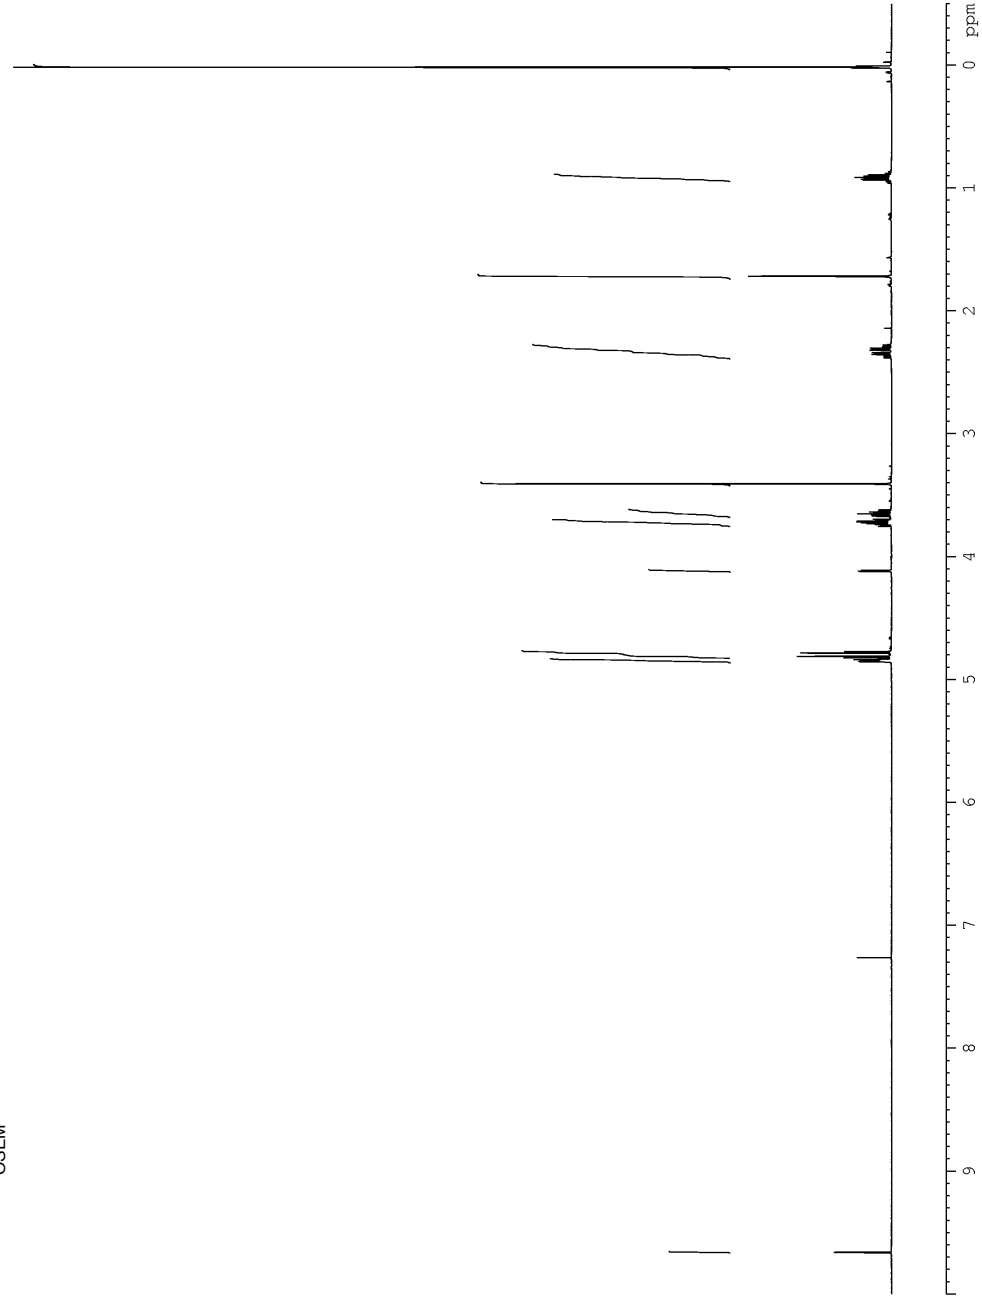

**Figure 9.** The <sup>1</sup>H NMR Spectrum of Compound (-)-**S3** in CDCl<sub>3</sub>

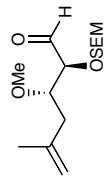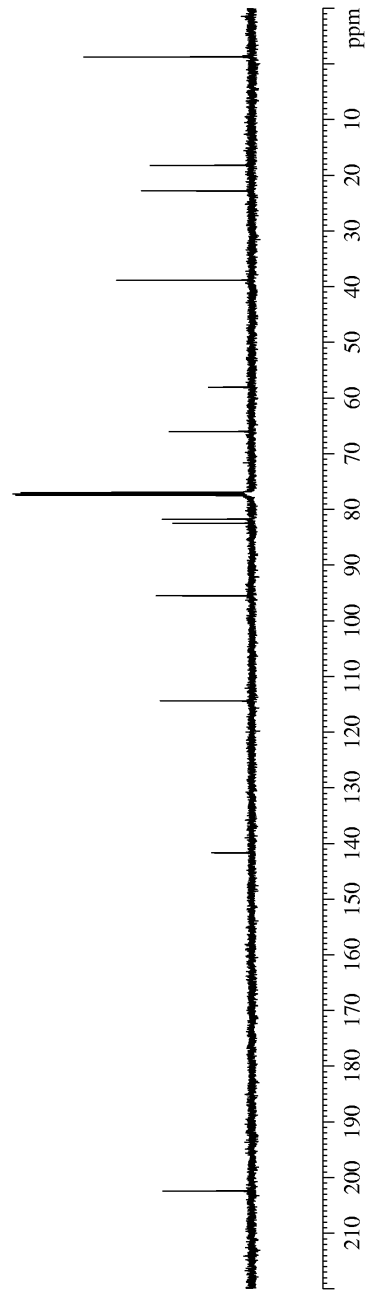

**Figure 10.** The  $^{13}\text{C}$  NMR Spectrum of Compound (-)-S3 in  $\text{CDCl}_3$ .

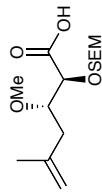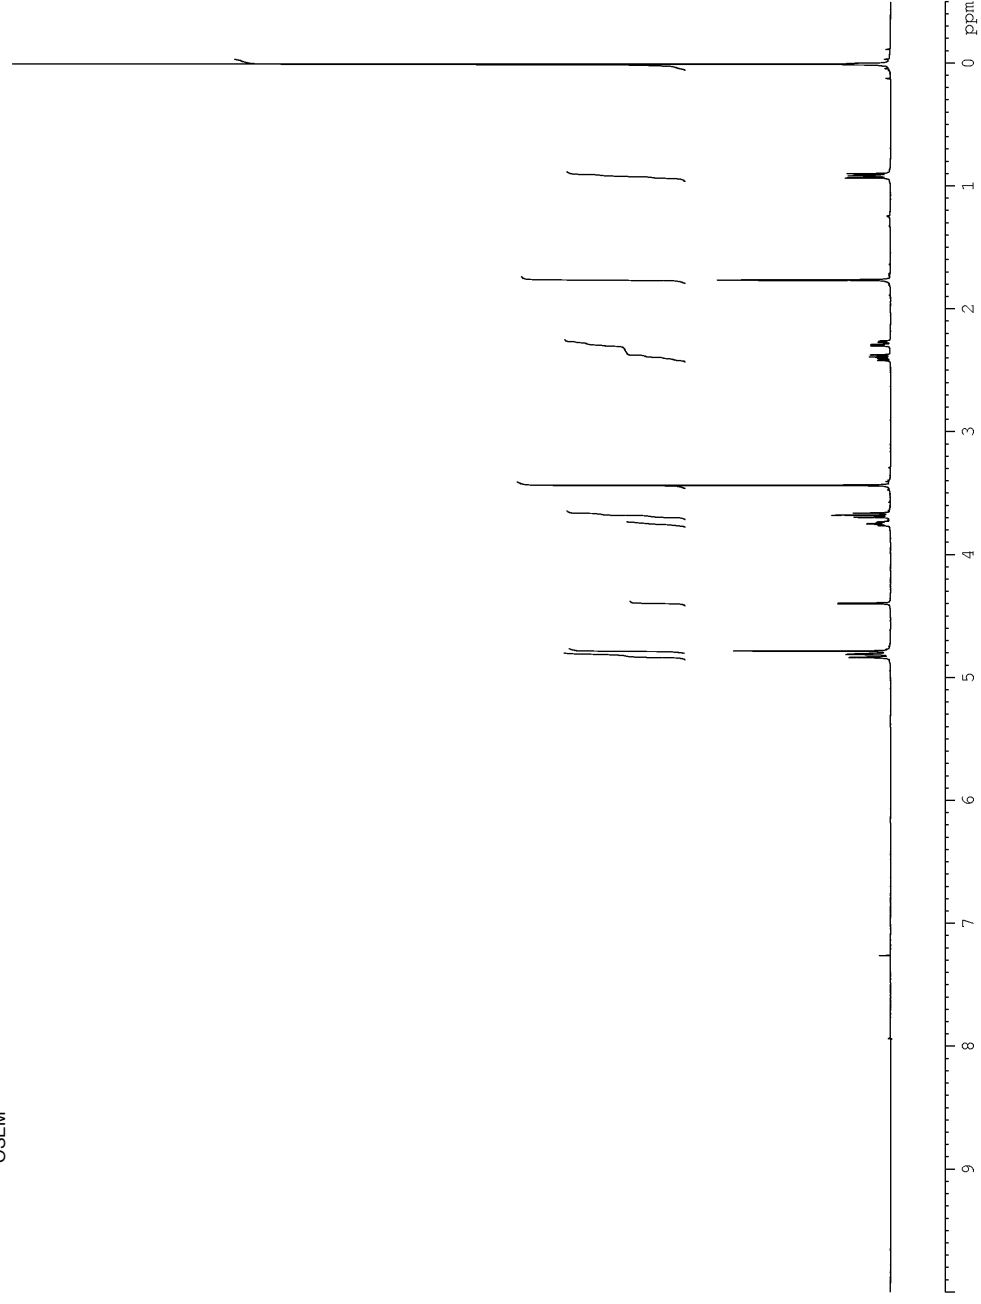

**Figure 11.** The <sup>1</sup>H NMR Spectrum of Compound (-)-2 in CDCl<sub>3</sub>



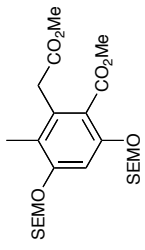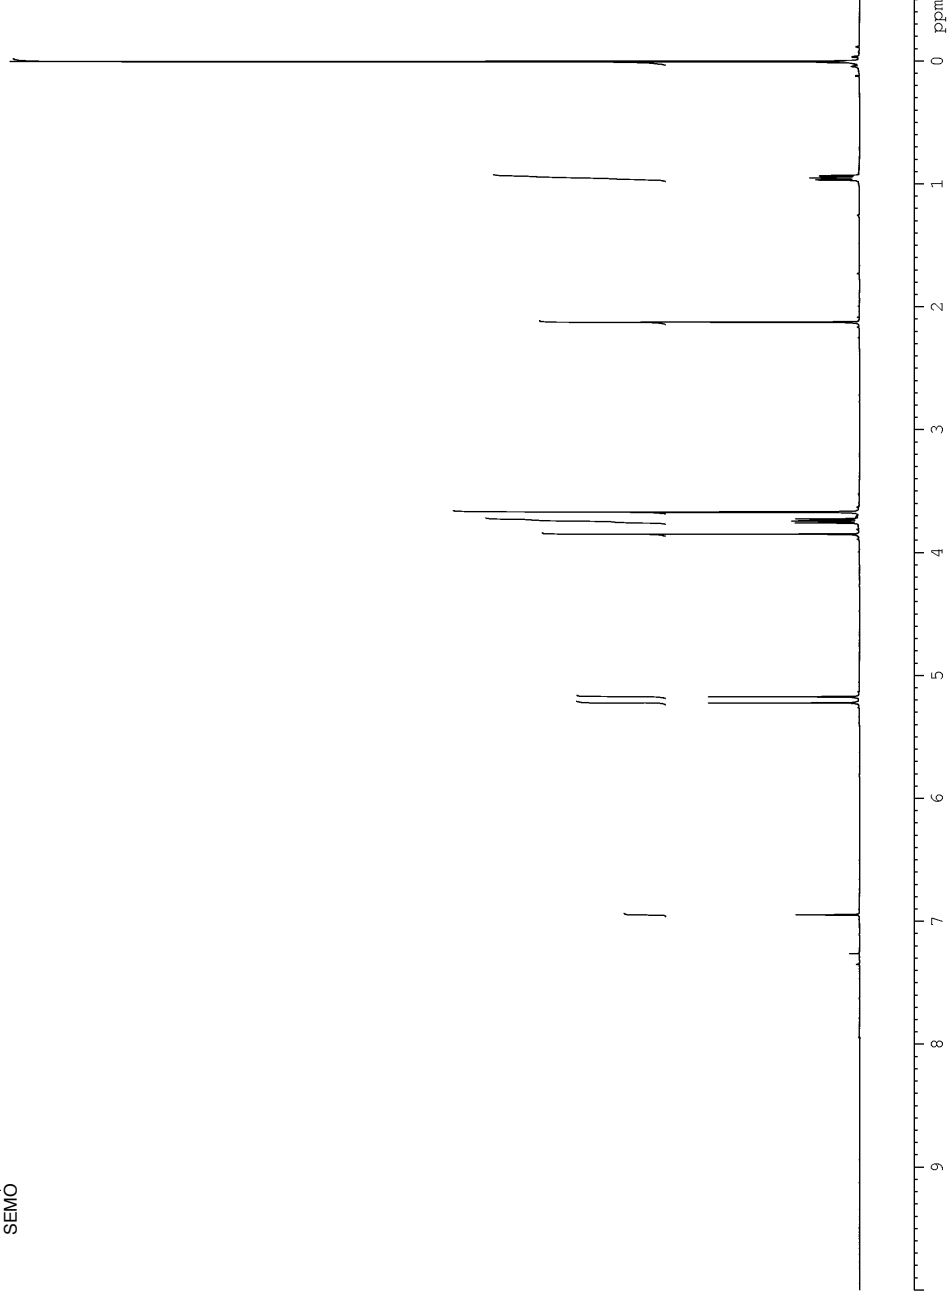

**Figure 13.** The <sup>1</sup>H NMR Spectrum of Compound S4 in CDCl<sub>3</sub>

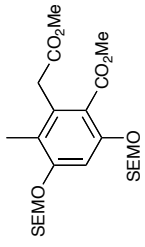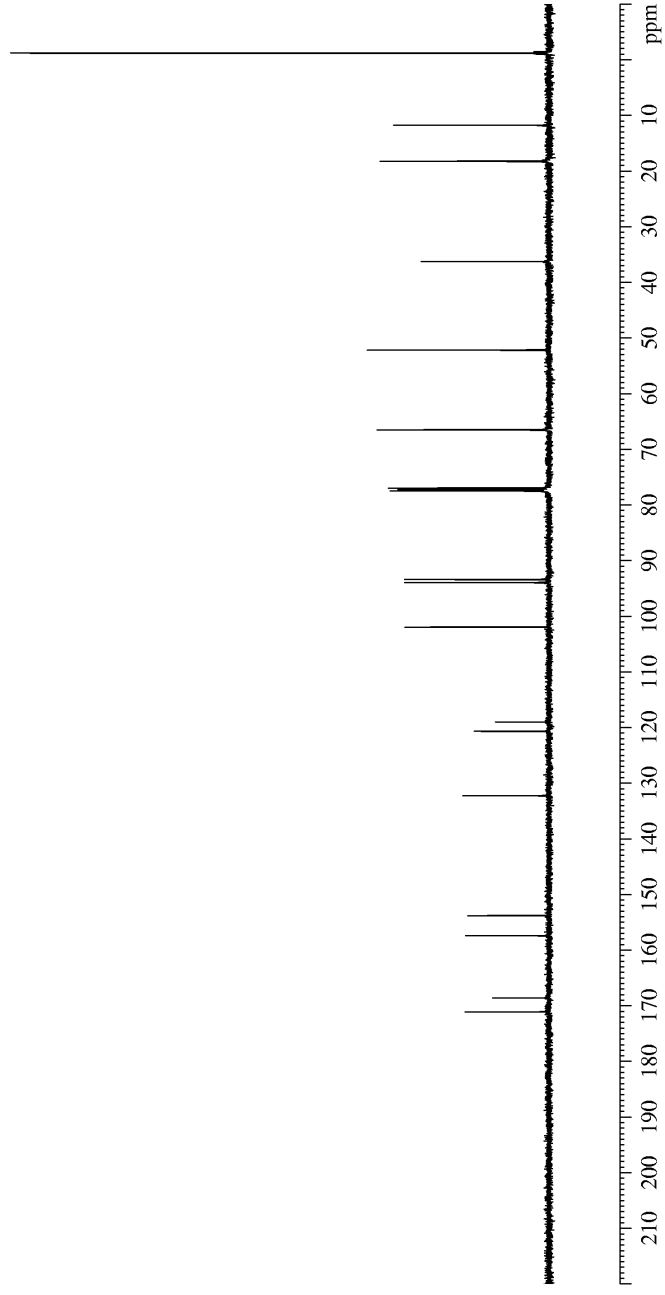

**Figure 14.** The  $^{13}\text{C}$  NMR Spectrum of Compound S4 in  $\text{CDCl}_3$

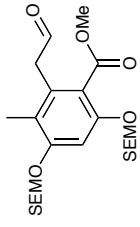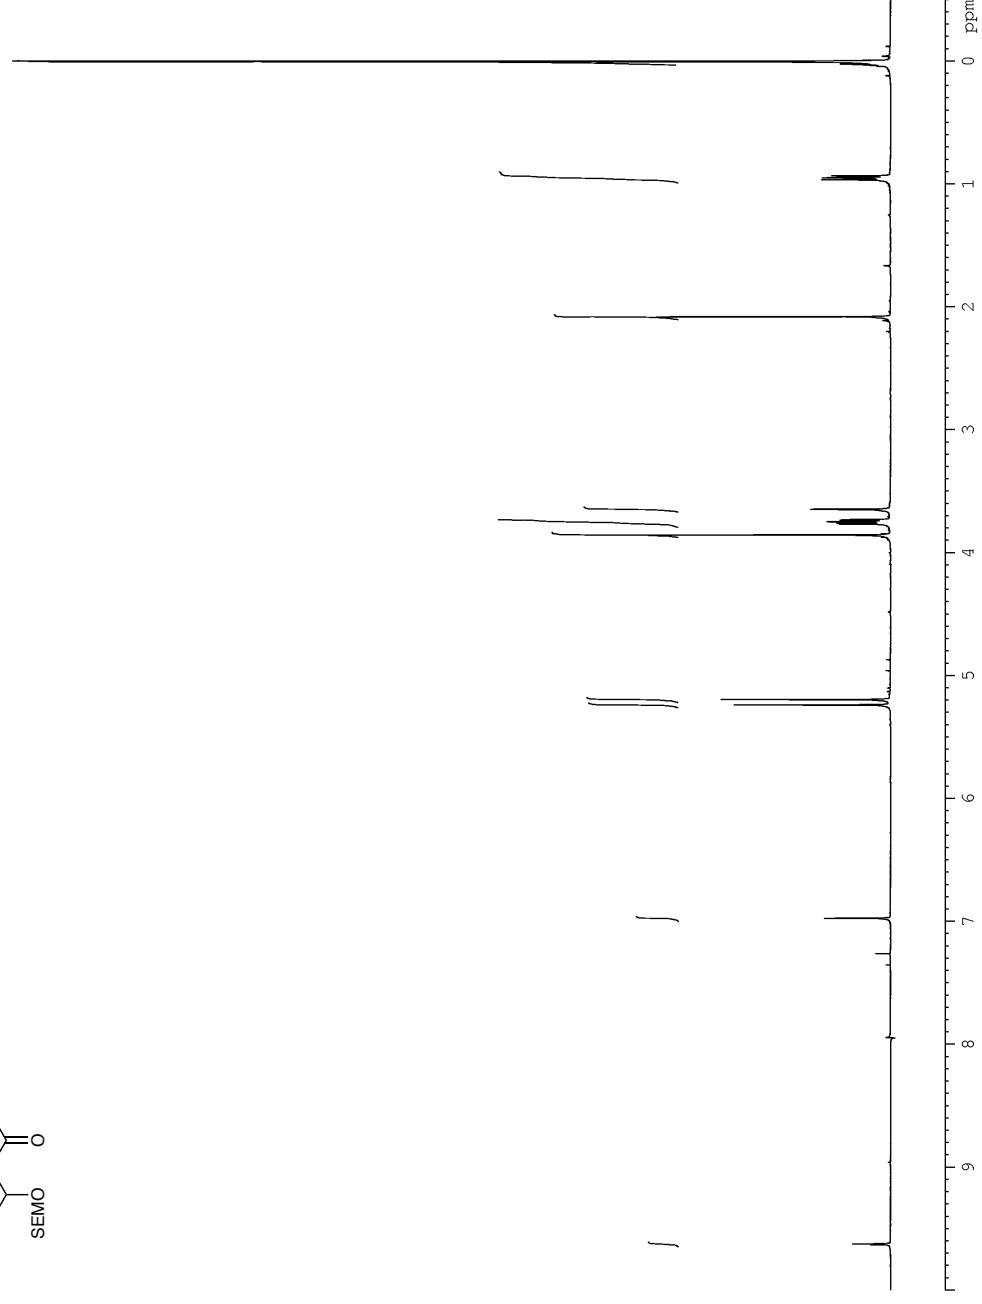

Figure 15. The  $^1\text{H}$  NMR Spectrum of Compound 4 in  $\text{CDCl}_3$

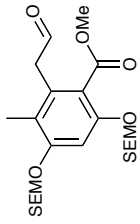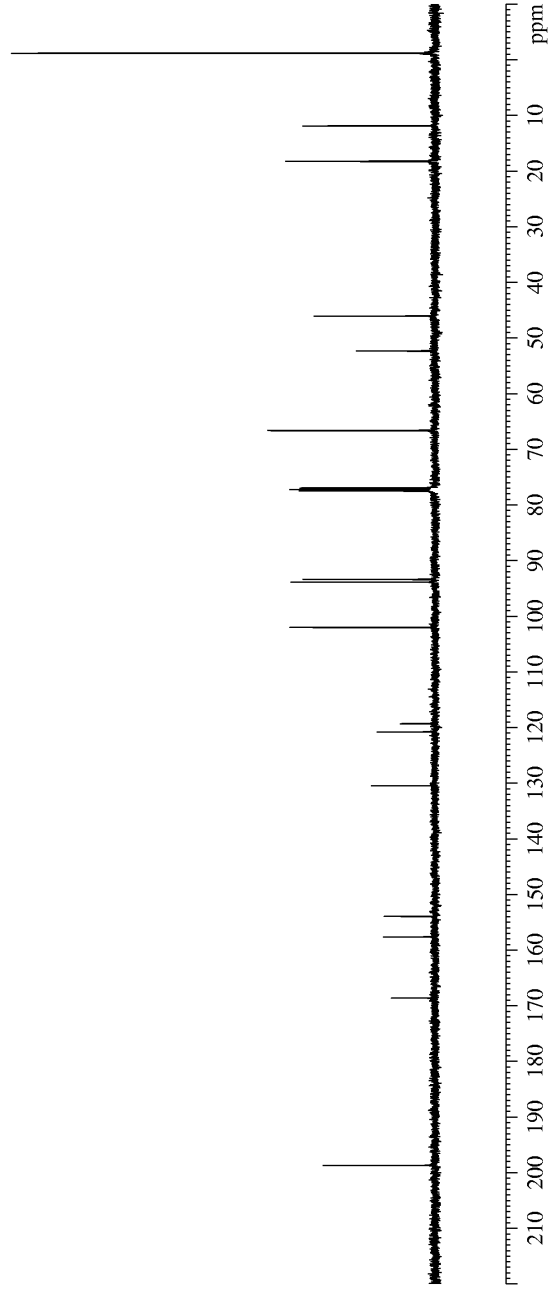

**Figure 16.** The <sup>13</sup>C NMR Spectrum of Compound 4 in CDCl<sub>3</sub>



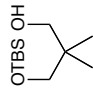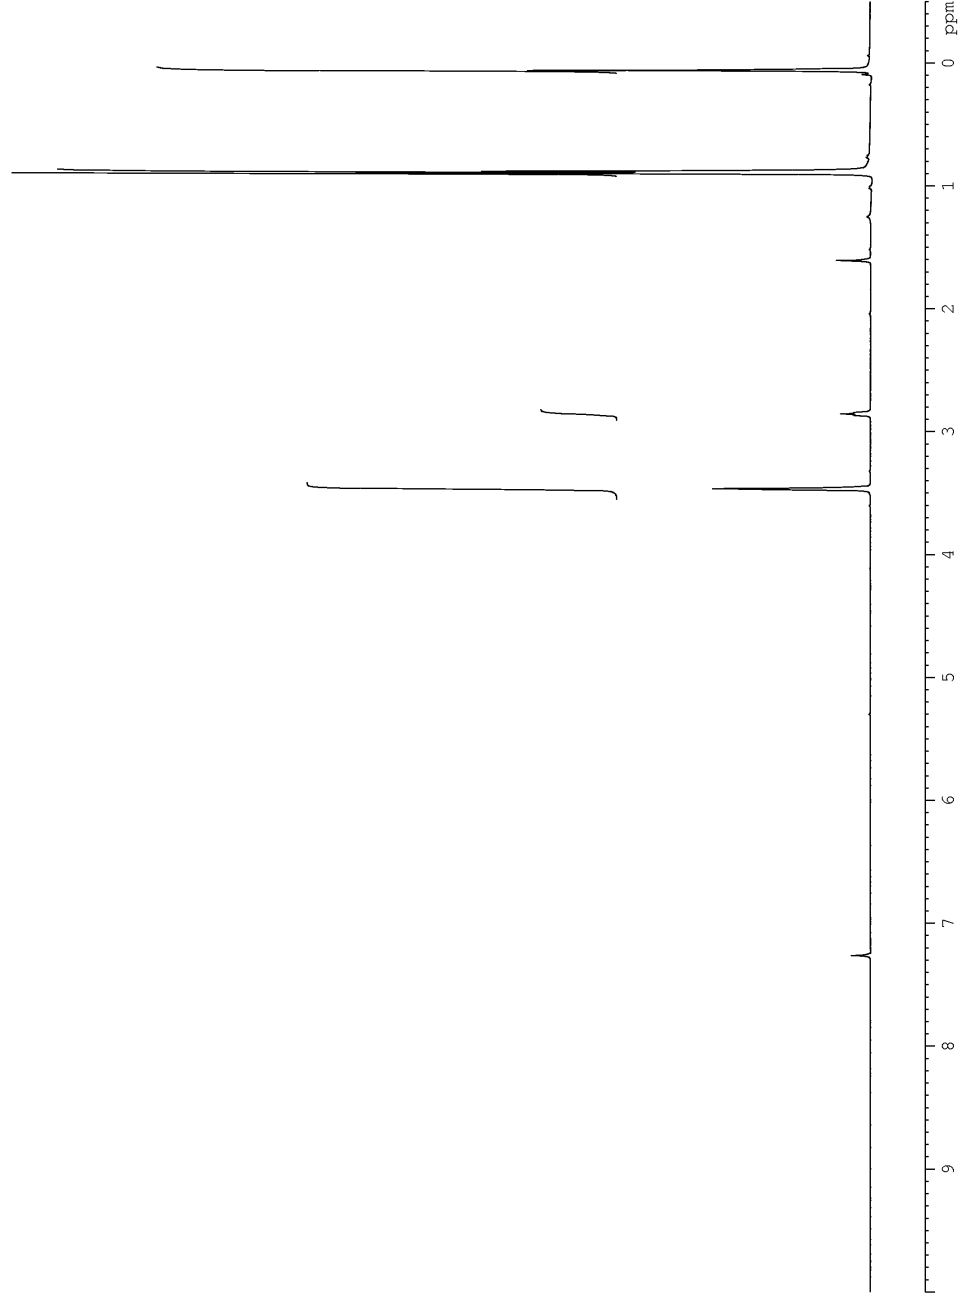

**Figure 17.** The <sup>1</sup>H NMR Spectrum of Compound **S5** in CDCl<sub>3</sub>



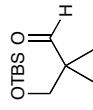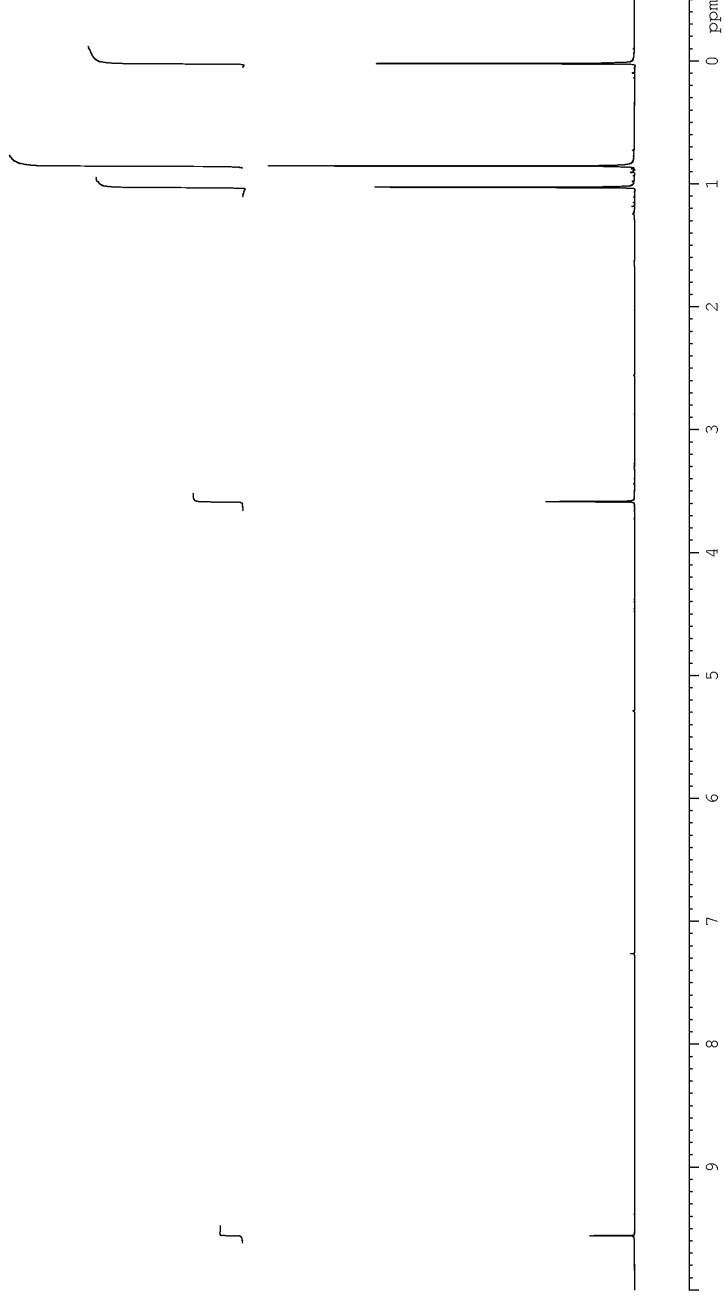

**Figure 19.** The  $^1\text{H}$  NMR Spectrum of Compound **15** in  $\text{CDCl}_3$

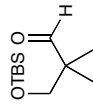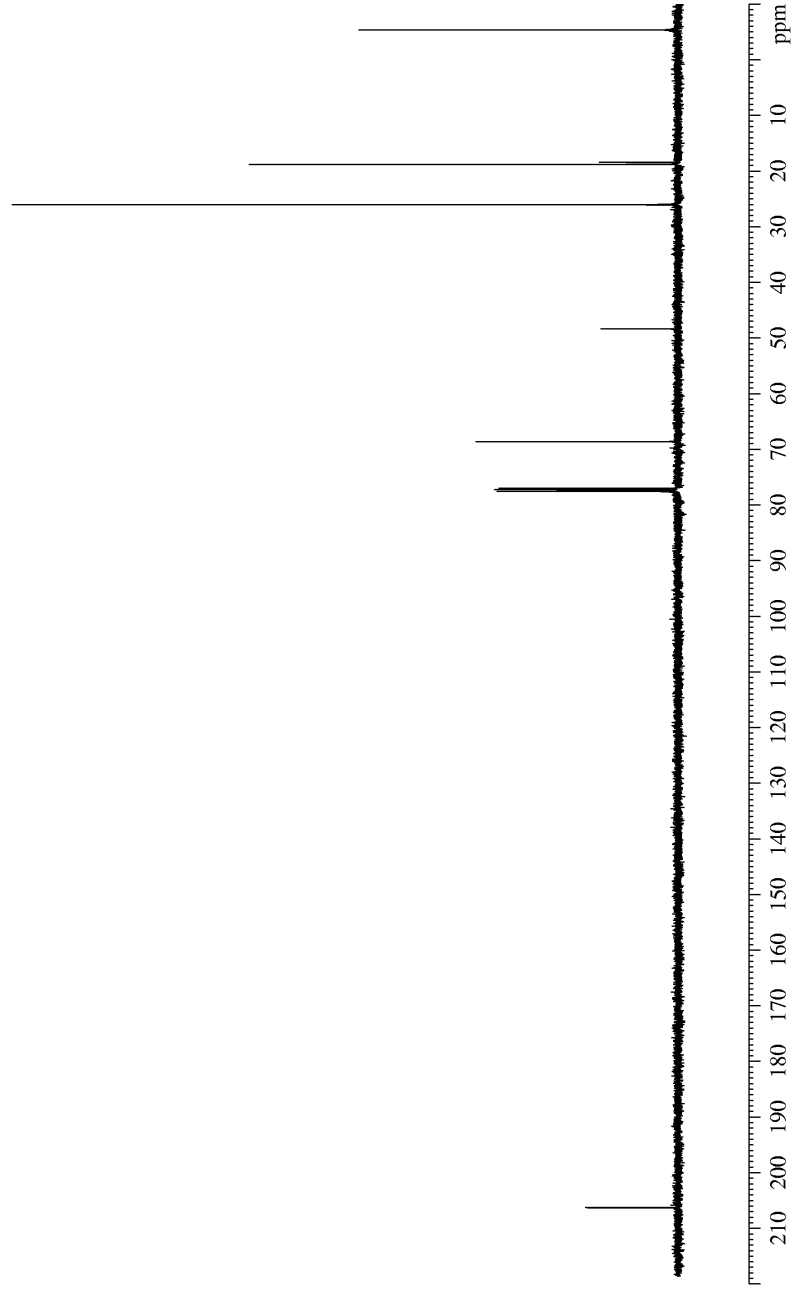

**Figure 20.** The  $^{13}\text{C}$  NMR Spectrum of Compound **15** in  $\text{CDCl}_3$

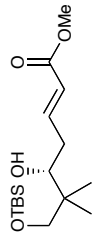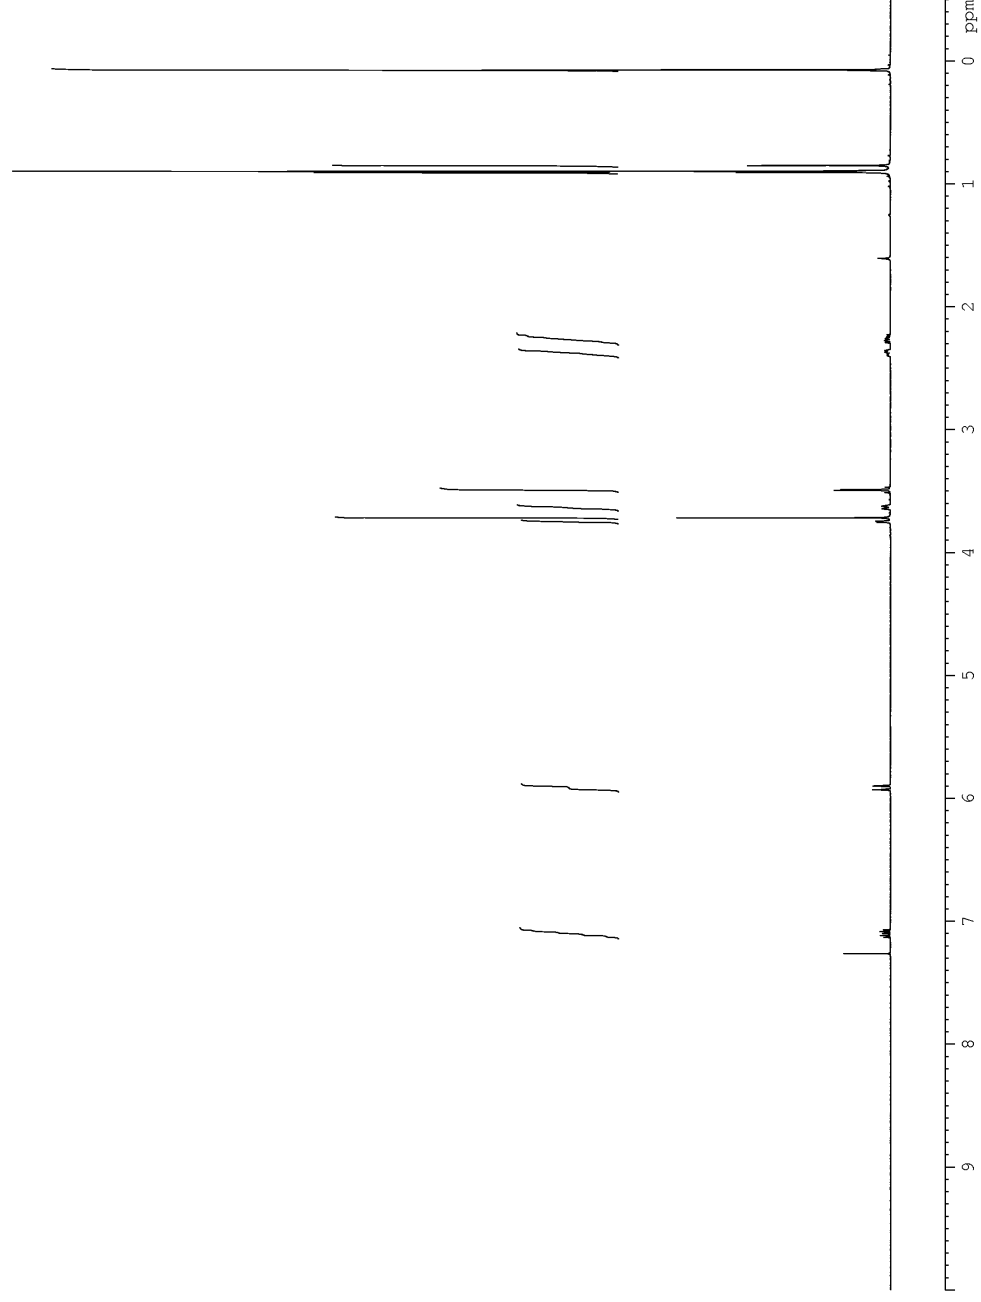

**Figure 21.** The  $^1\text{H}$  NMR Spectrum of Compound (+)-9 in  $\text{CDCl}_3$

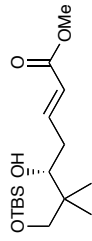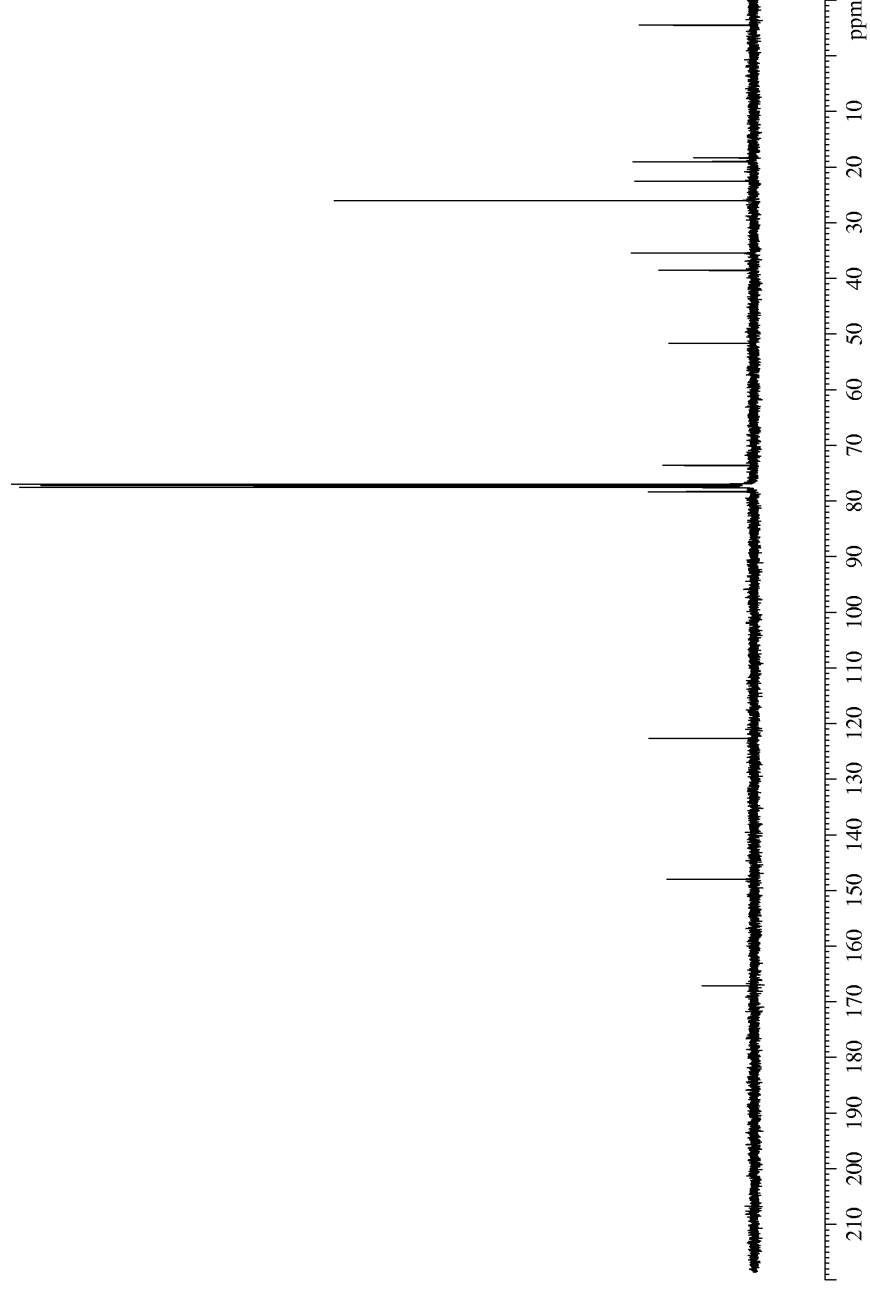

**Figure 22.** The  $^{13}\text{C}$  NMR Spectrum of Compound (+)-9 in  $\text{CDCl}_3$

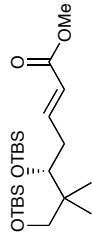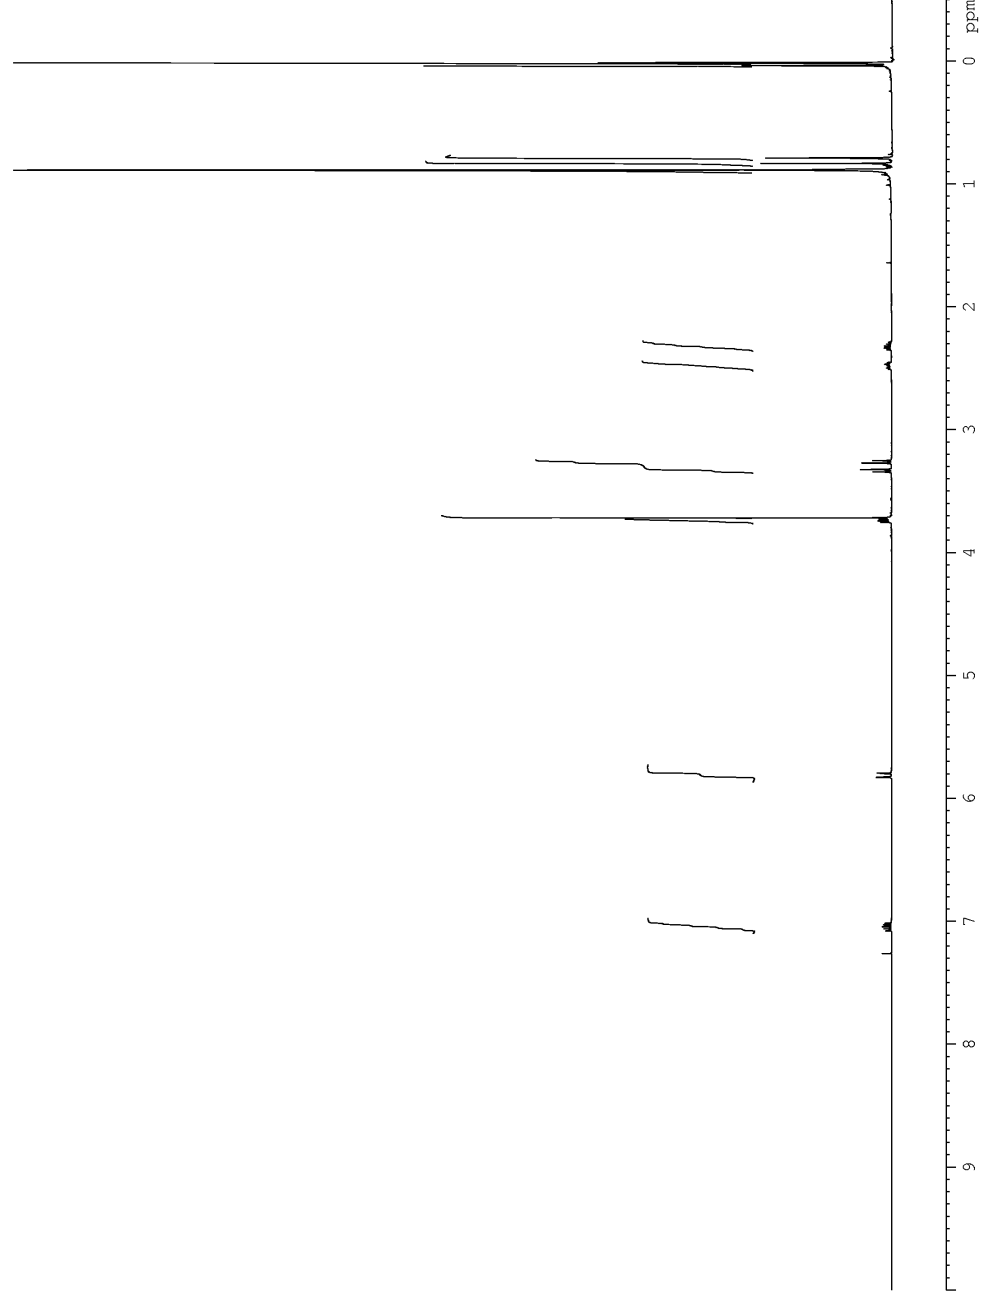

**Figure 23.** The  $^1\text{H}$  NMR Spectrum of Compound (+)-S6 in  $\text{CDCl}_3$

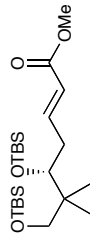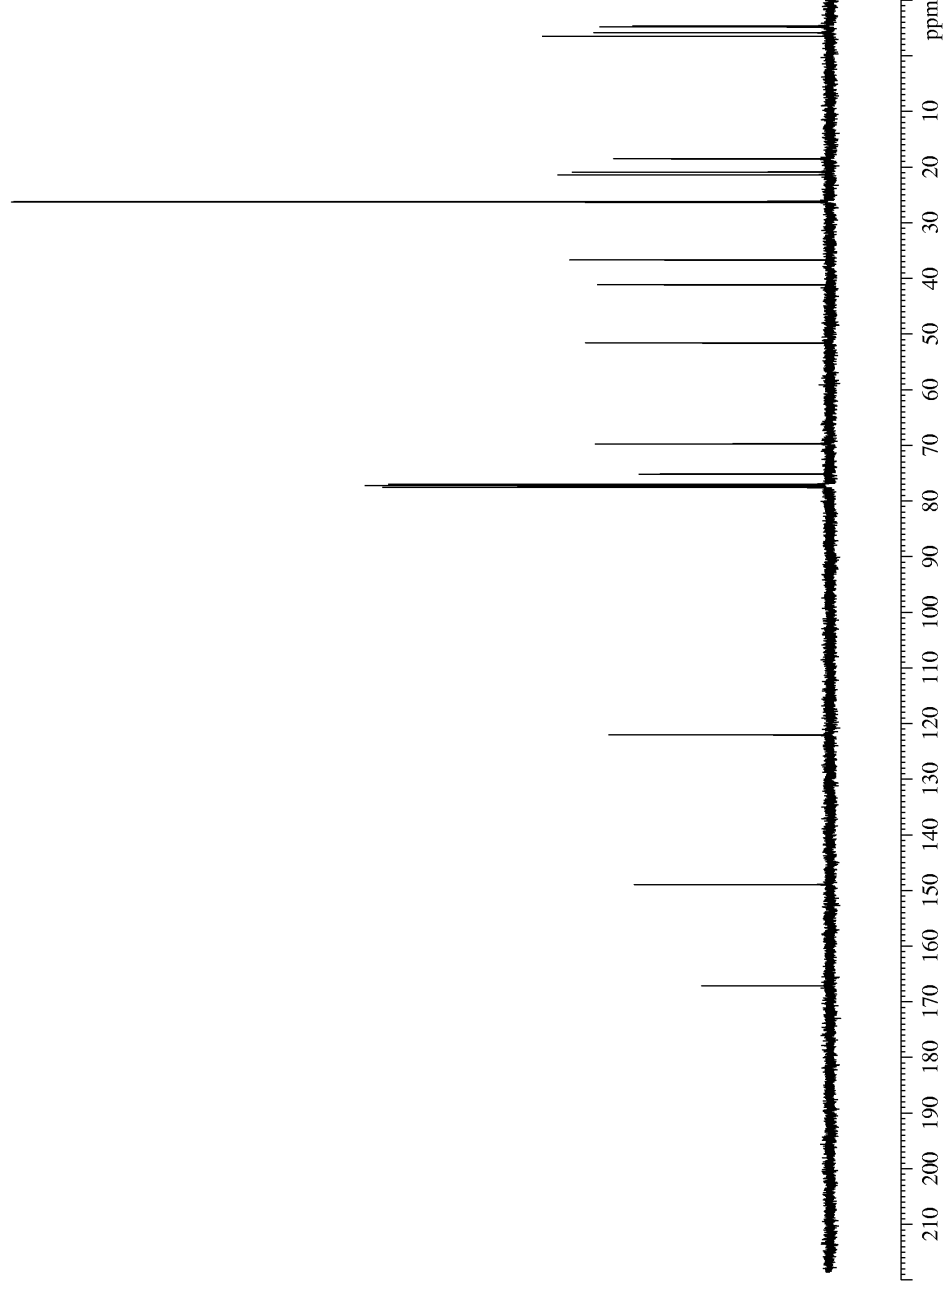

**Figure 24.** The  $^{13}\text{C}$  NMR Spectrum of Compound (+)-S6 in  $\text{CDCl}_3$



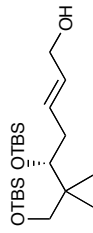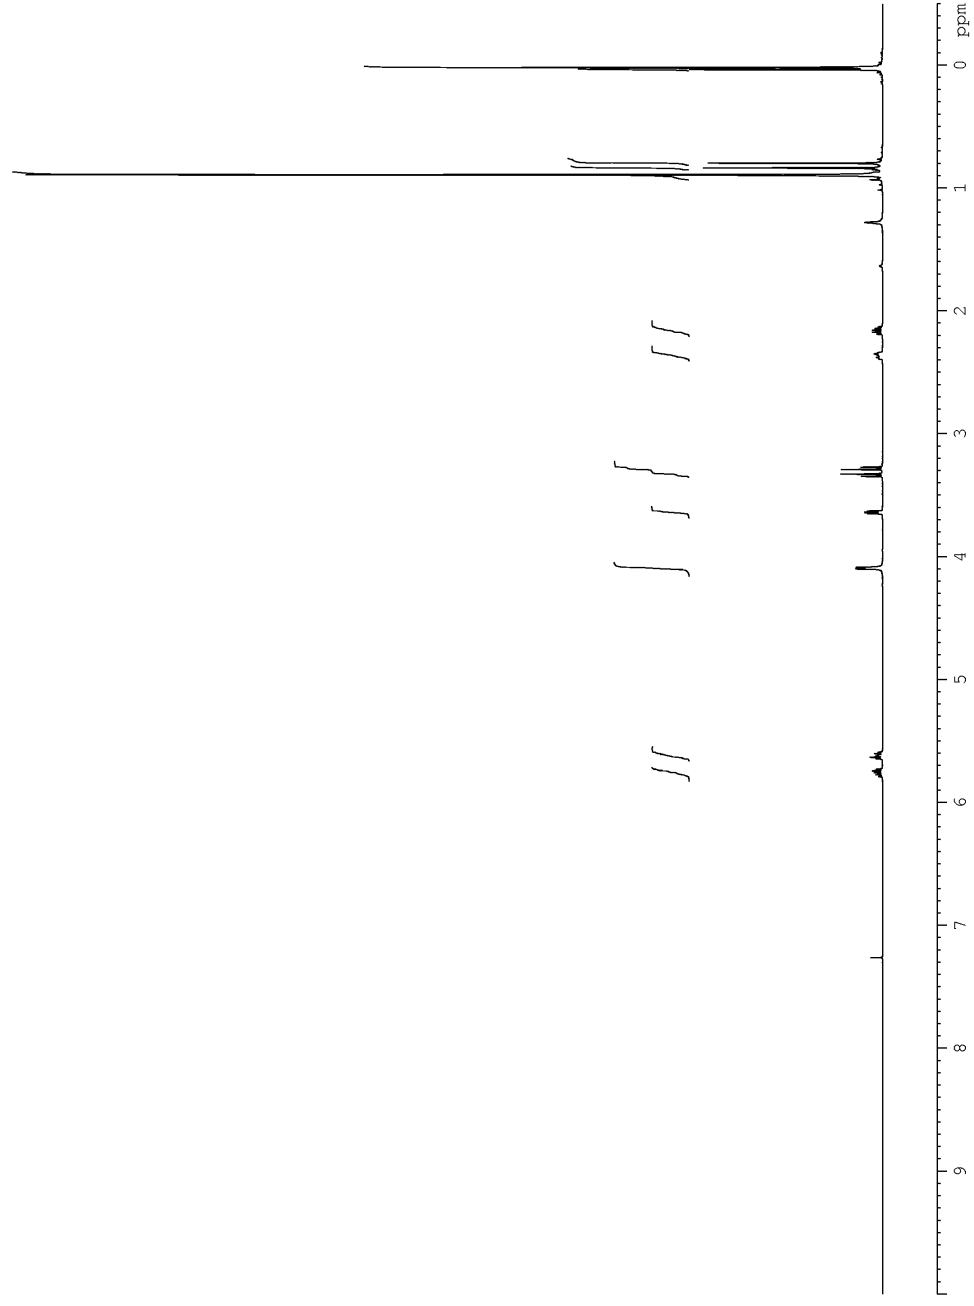

**Figure 25.** The <sup>1</sup>H NMR Spectrum of Compound (-)-S7 in CDCl<sub>3</sub>

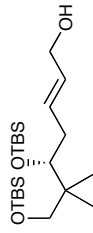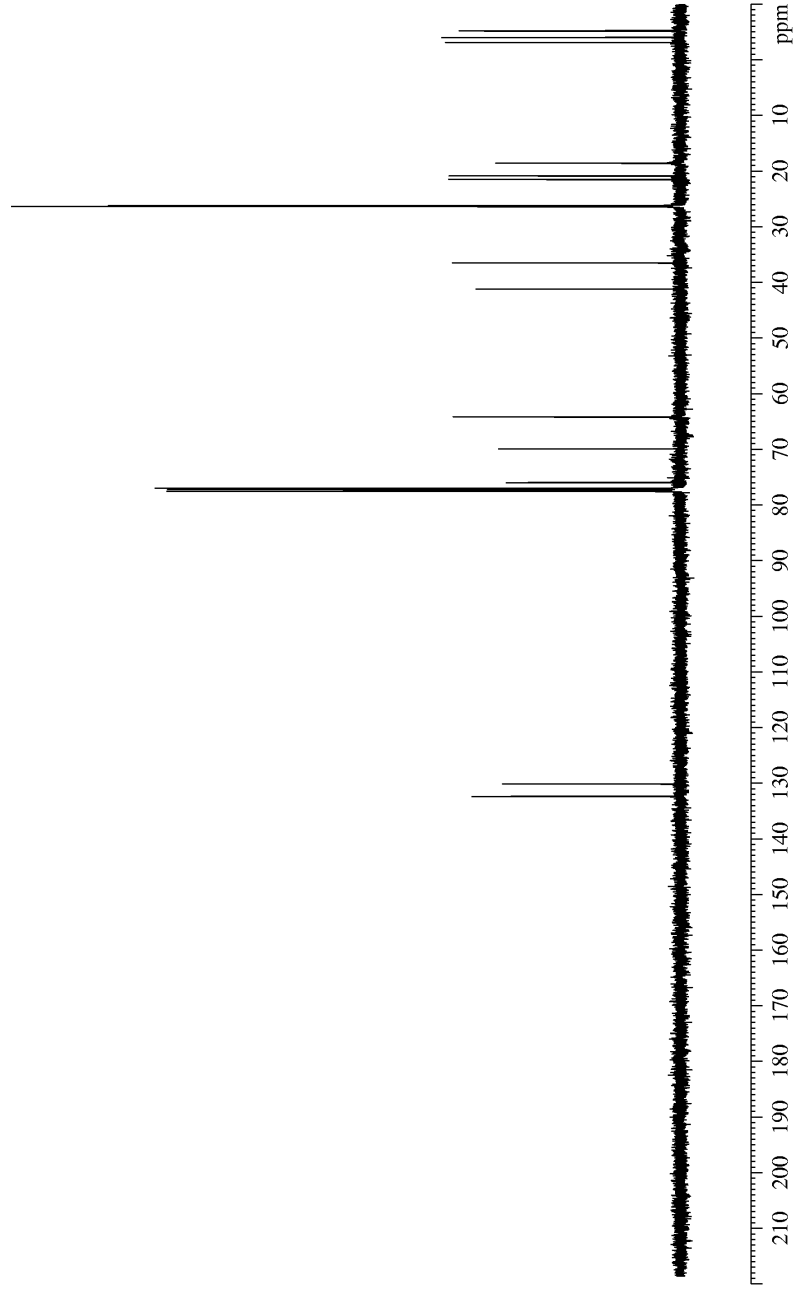

**Figure 26.** The  $^{13}\text{C}$  NMR Spectrum of Compound (-)-S7 in  $\text{CDCl}_3$ .

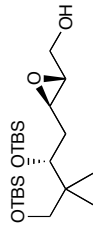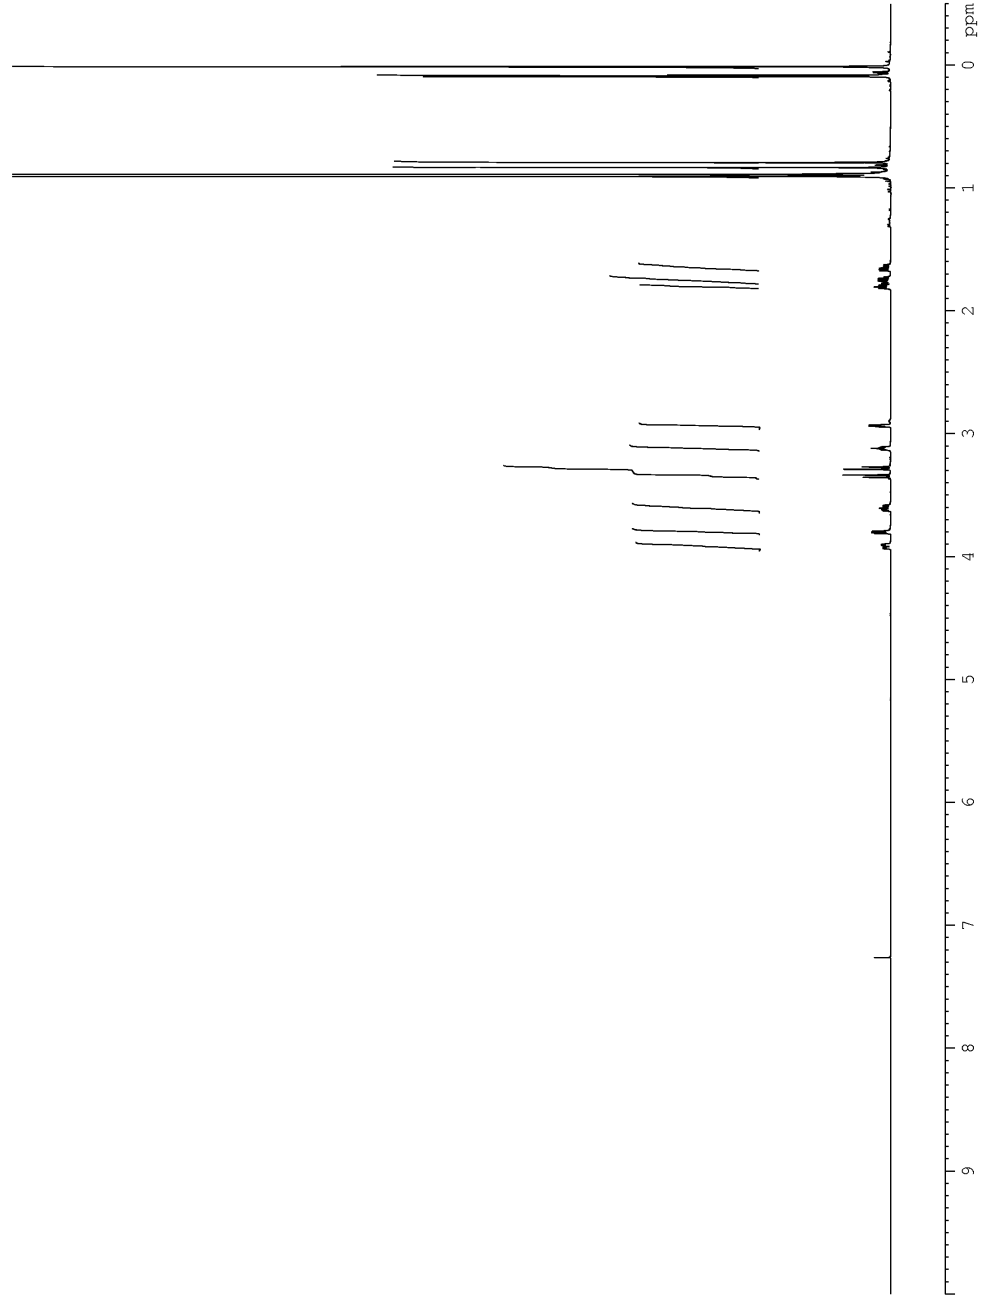

**Figure 27.** The <sup>1</sup>H NMR Spectrum of Compound (+)-17 in CDCl<sub>3</sub>

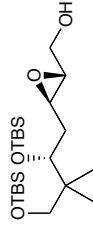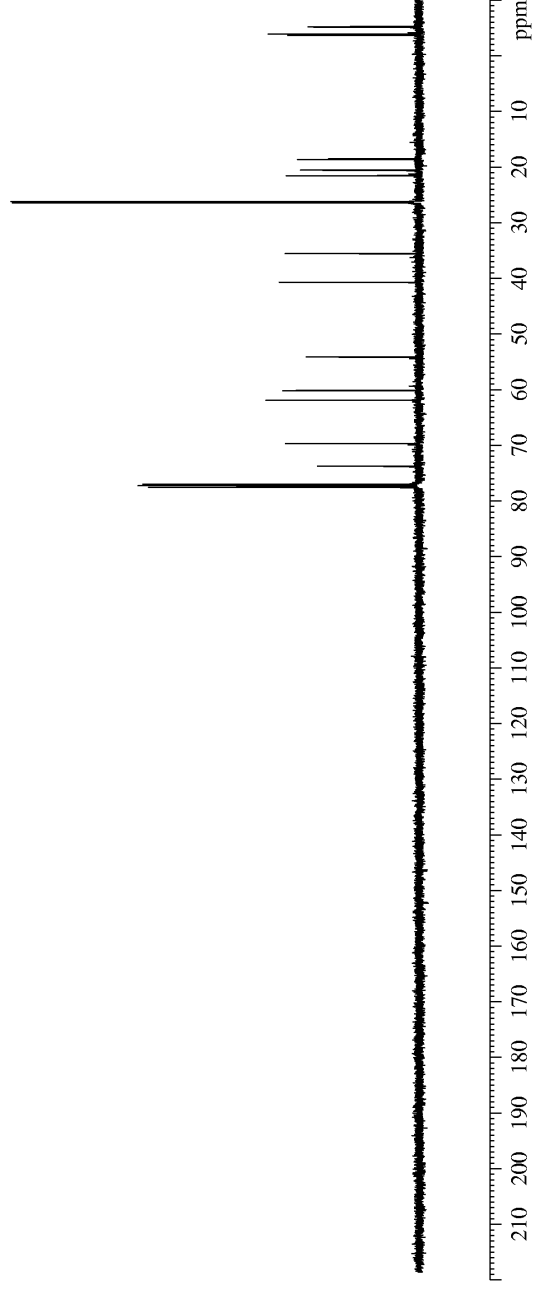

**Figure 28.** The  $^{13}\text{C}$  NMR Spectrum of Compound (+)-17 in  $\text{CDCl}_3$ .



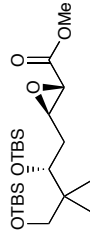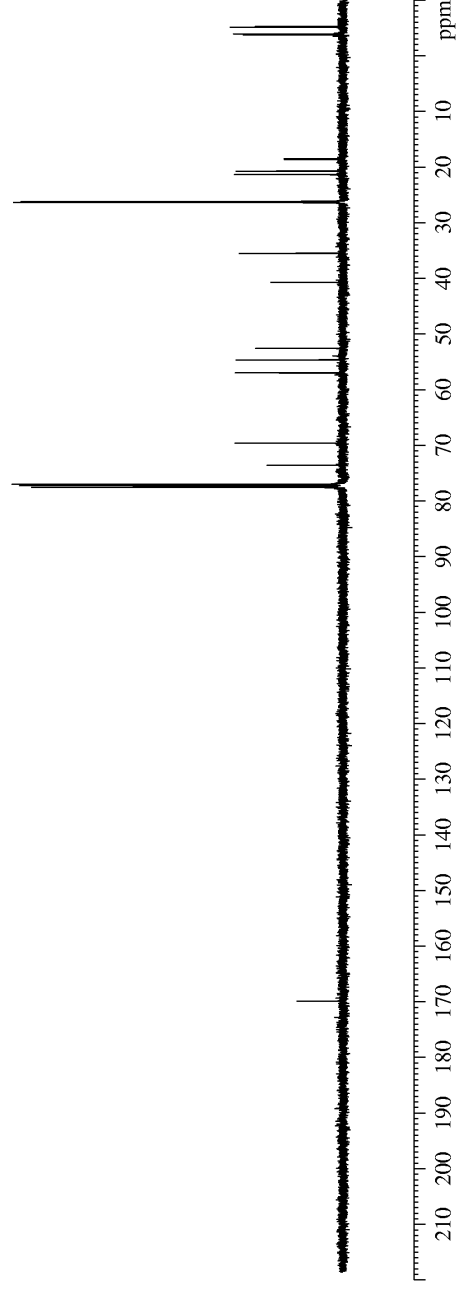

**Figure 30.** The  $^{13}\text{C}$  NMR Spectrum of Compound (+)-18 in  $\text{CDCl}_3$

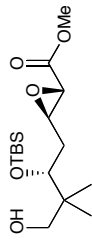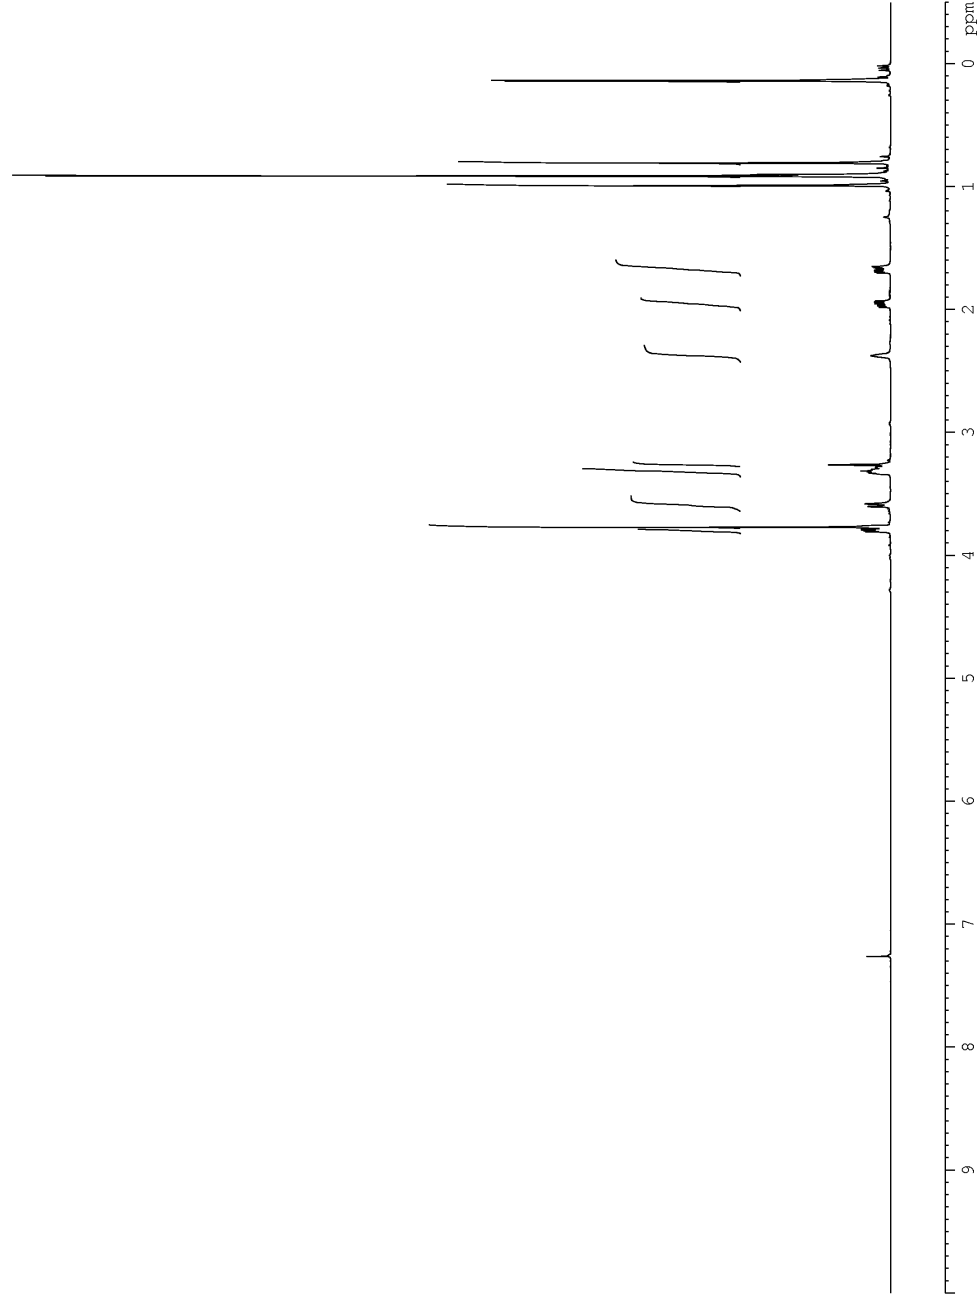

**Figure 31.** The <sup>1</sup>H NMR Spectrum of Compound (+)-19 in CDCl<sub>3</sub>

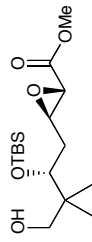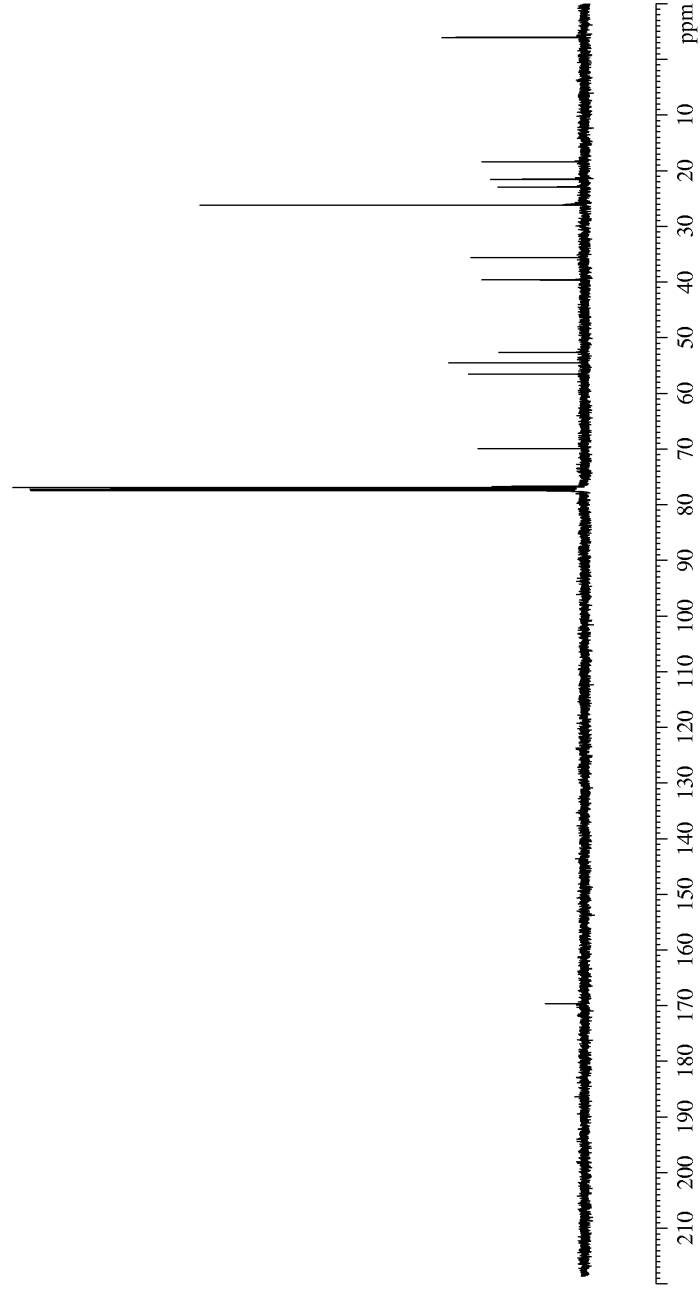

**Figure 32.** The  $^{13}\text{C}$  NMR Spectrum of Compound (+)-19 in  $\text{CDCl}_3$



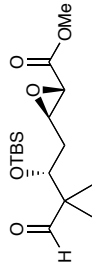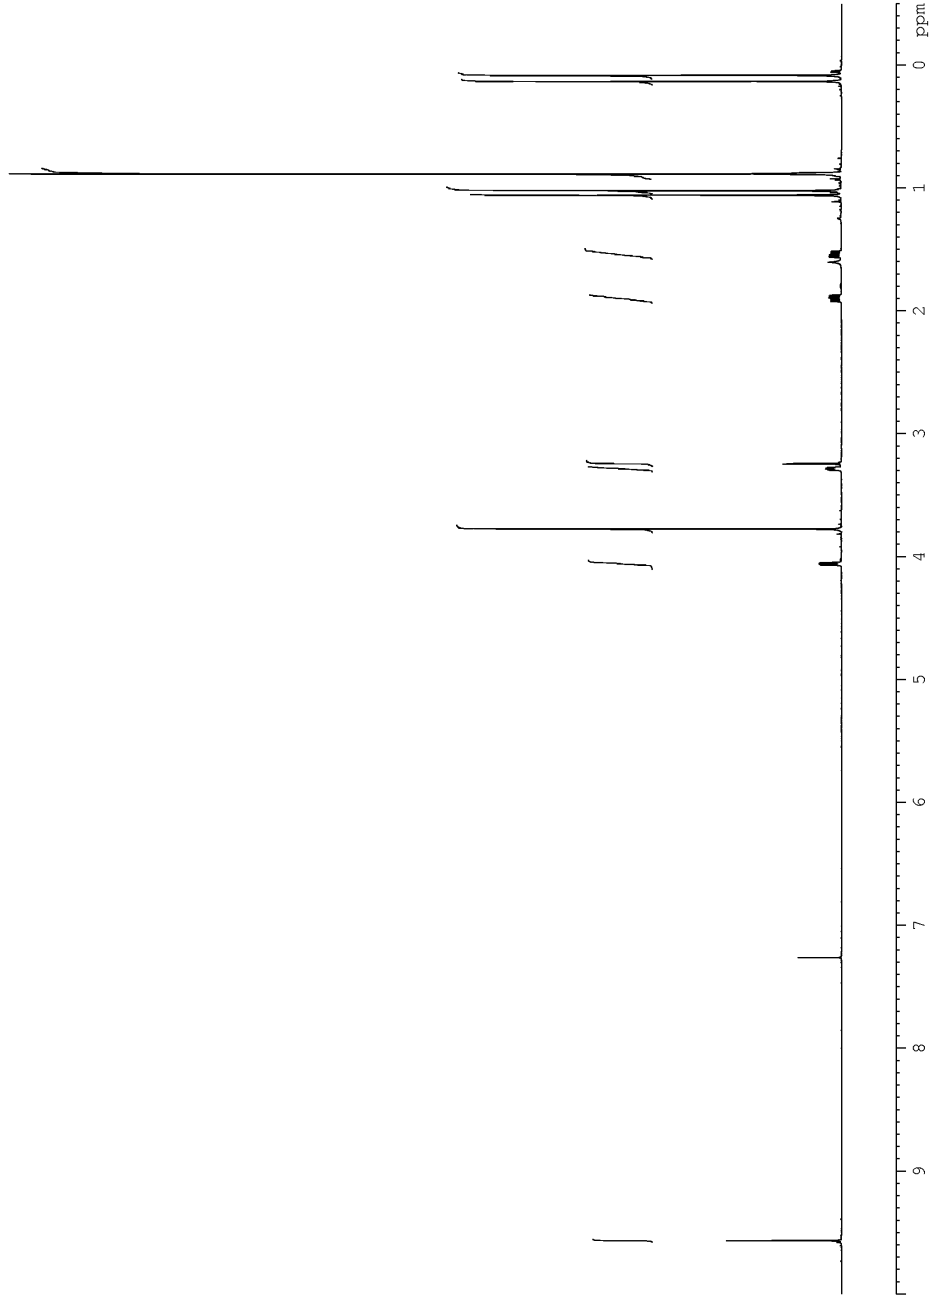

**Figure 33.** The  $^1\text{H}$  NMR Spectrum of Compound (+)-20 in  $\text{CDCl}_3$

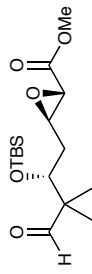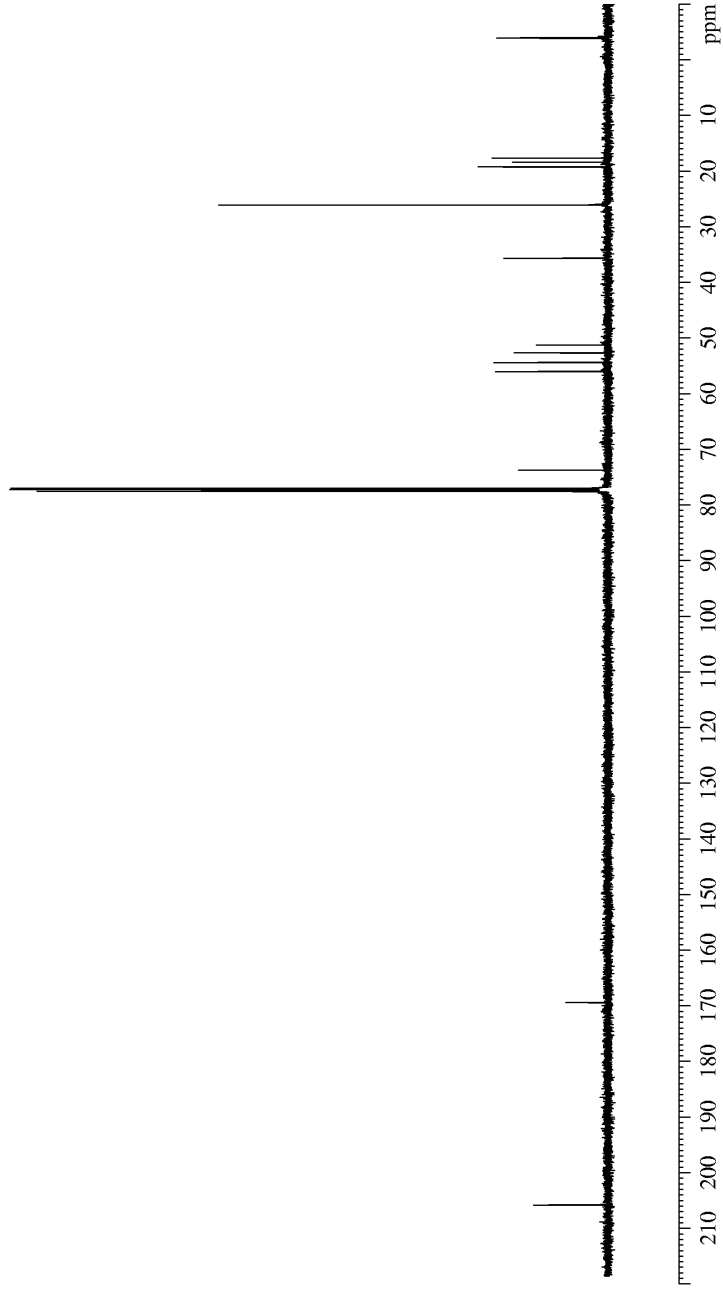

**Figure 34.** The  $^{13}\text{C}$  NMR Spectrum of Compound (+)-**20** in  $\text{CDCl}_3$

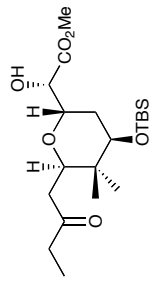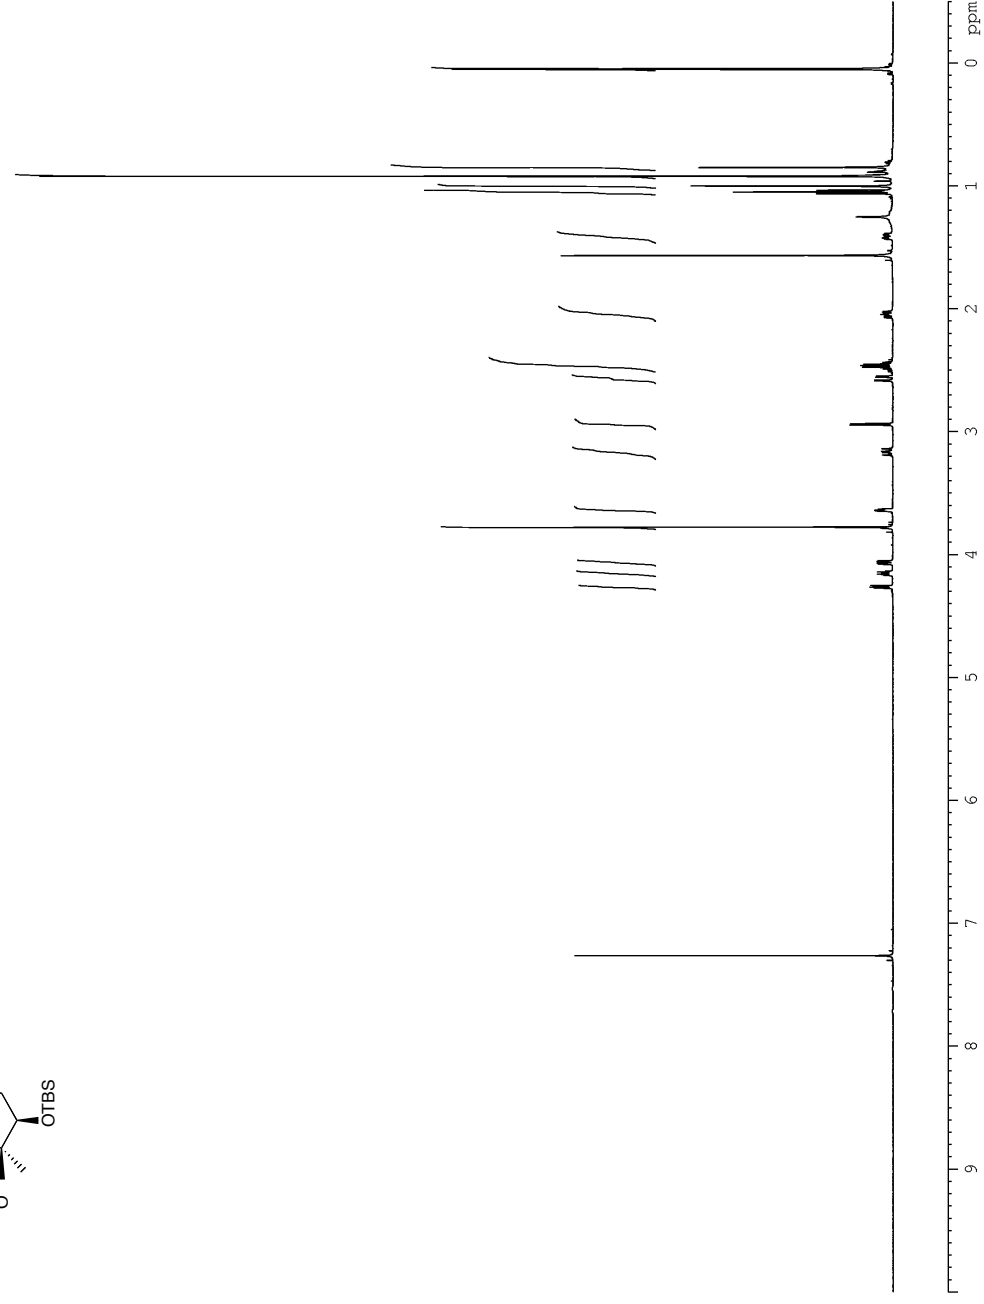

**Figure 35.** The <sup>1</sup>H NMR Spectrum of Compound (+)-22 in CDCl<sub>3</sub>

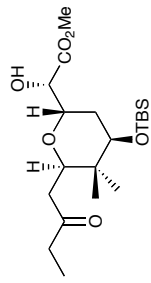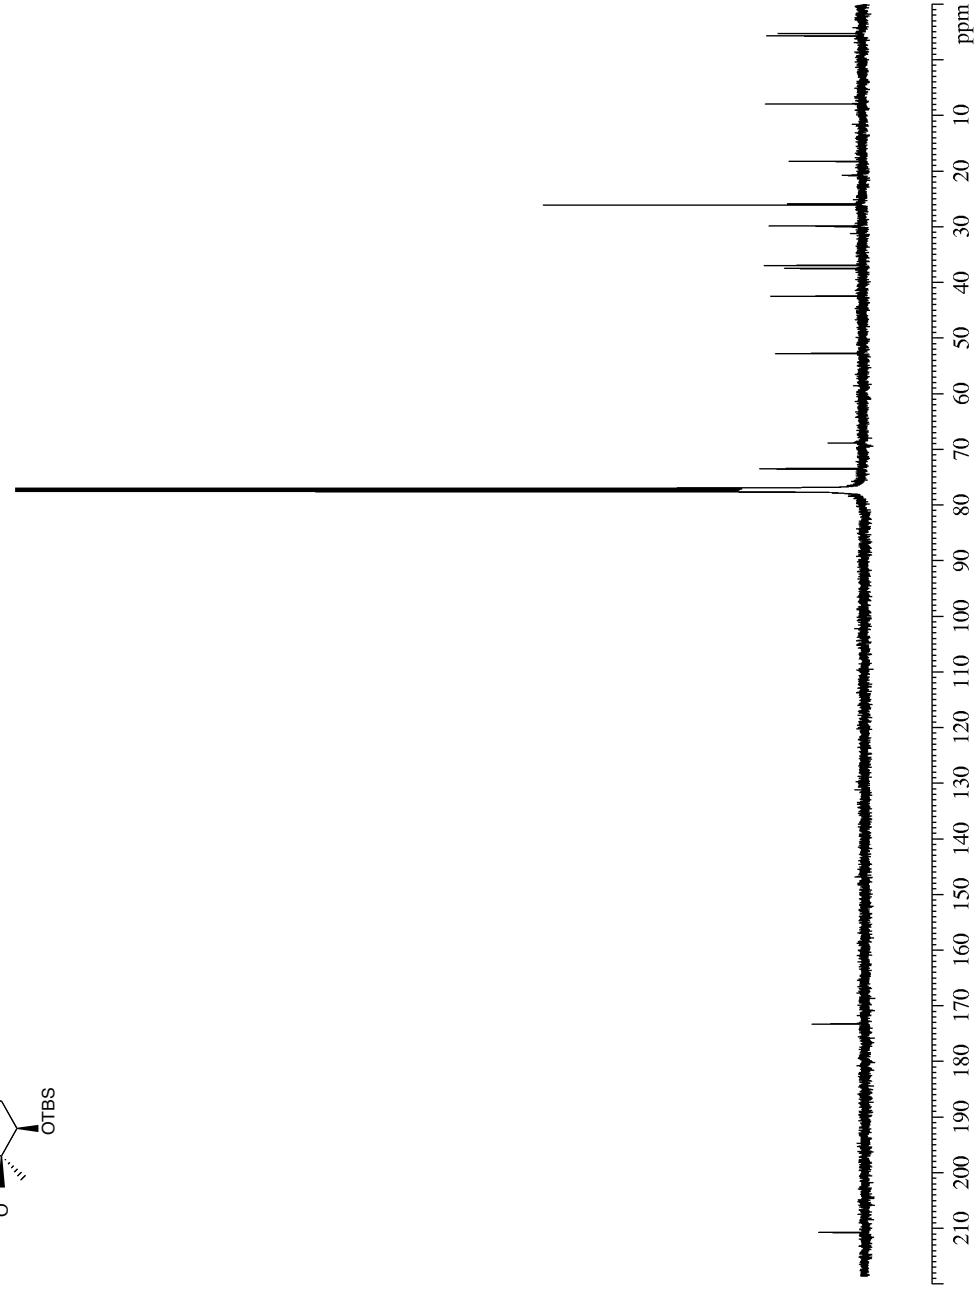

**Figure 36.** The  $^{13}\text{C}$  NMR Spectrum of Compound (+)-22 in  $\text{CDCl}_3$

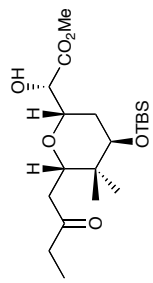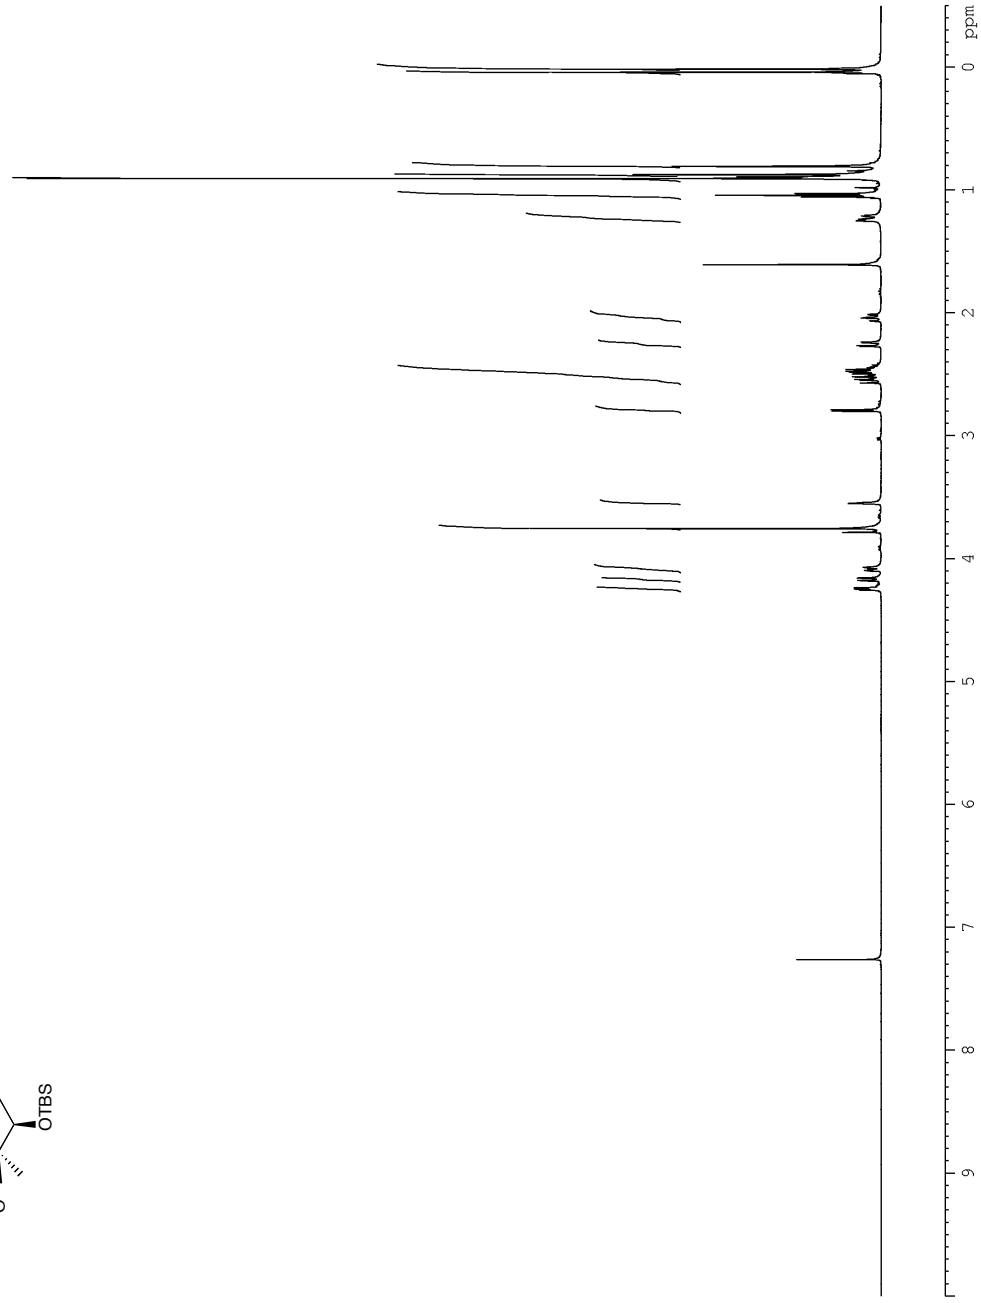

**Figure 37.** The  $^1\text{H}$  NMR Spectrum of Compound (-)-23 in  $\text{CDCl}_3$



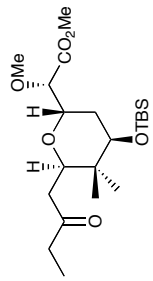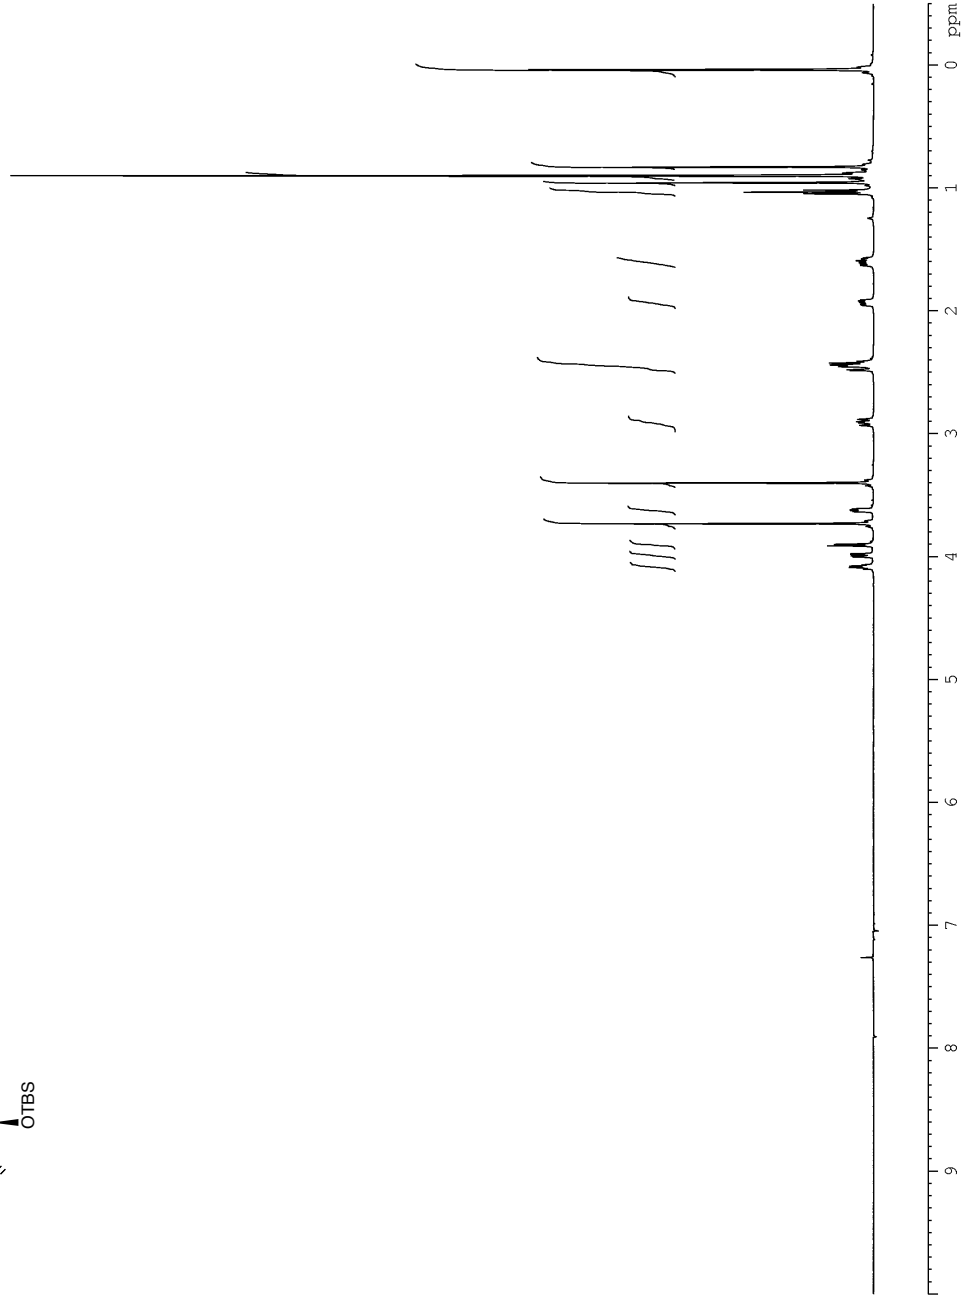

Figure 39. The  $^1\text{H}$  NMR Spectrum of Compound (+)-5 in  $\text{CDCl}_3$







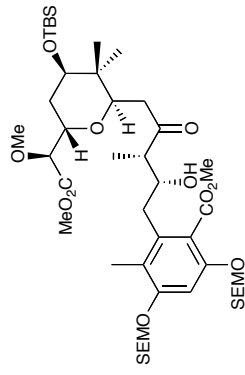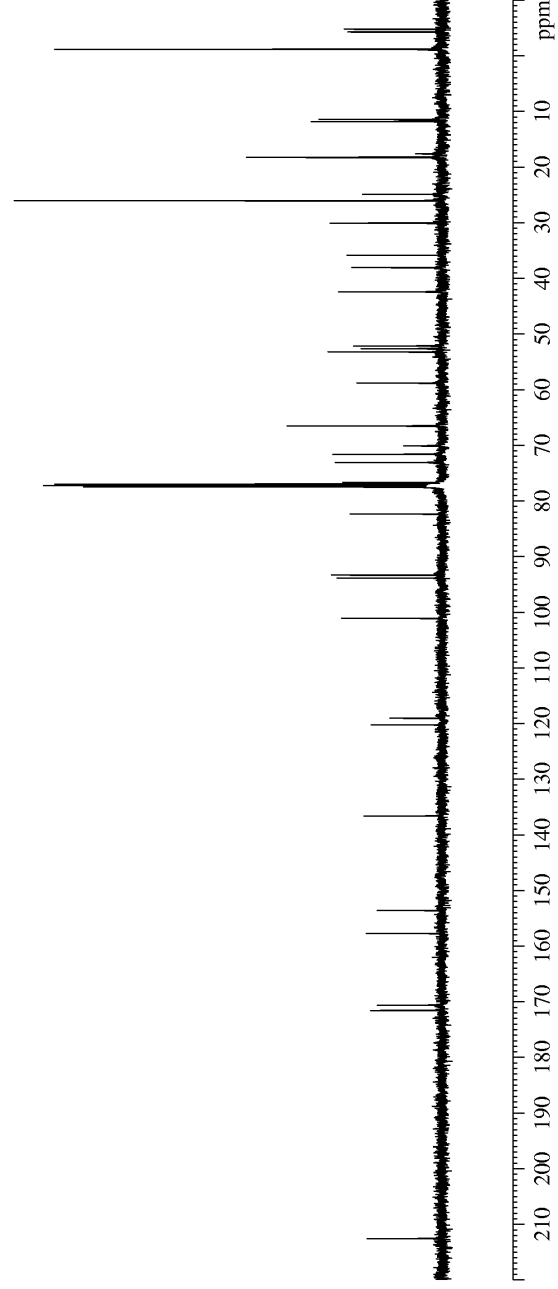

**Figure 42.** The  $^{13}\text{C}$  NMR Spectrum of Compound (+)-24 in  $\text{CDCl}_3$

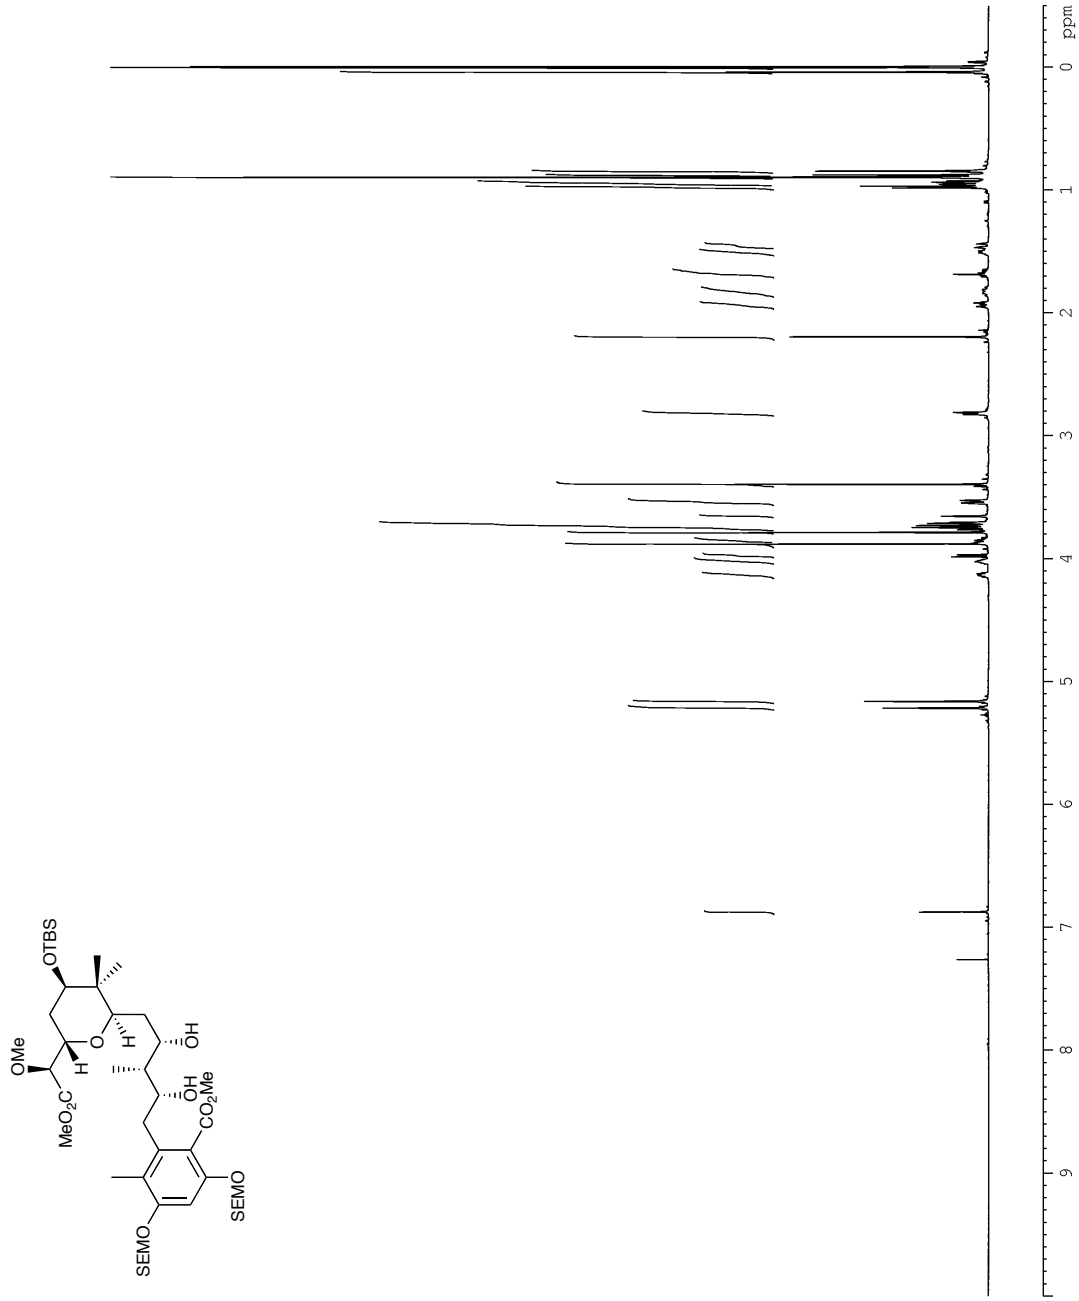

**Figure 43.** The <sup>1</sup>H NMR Spectrum of Compound (+)-S8 in CDCl<sub>3</sub>

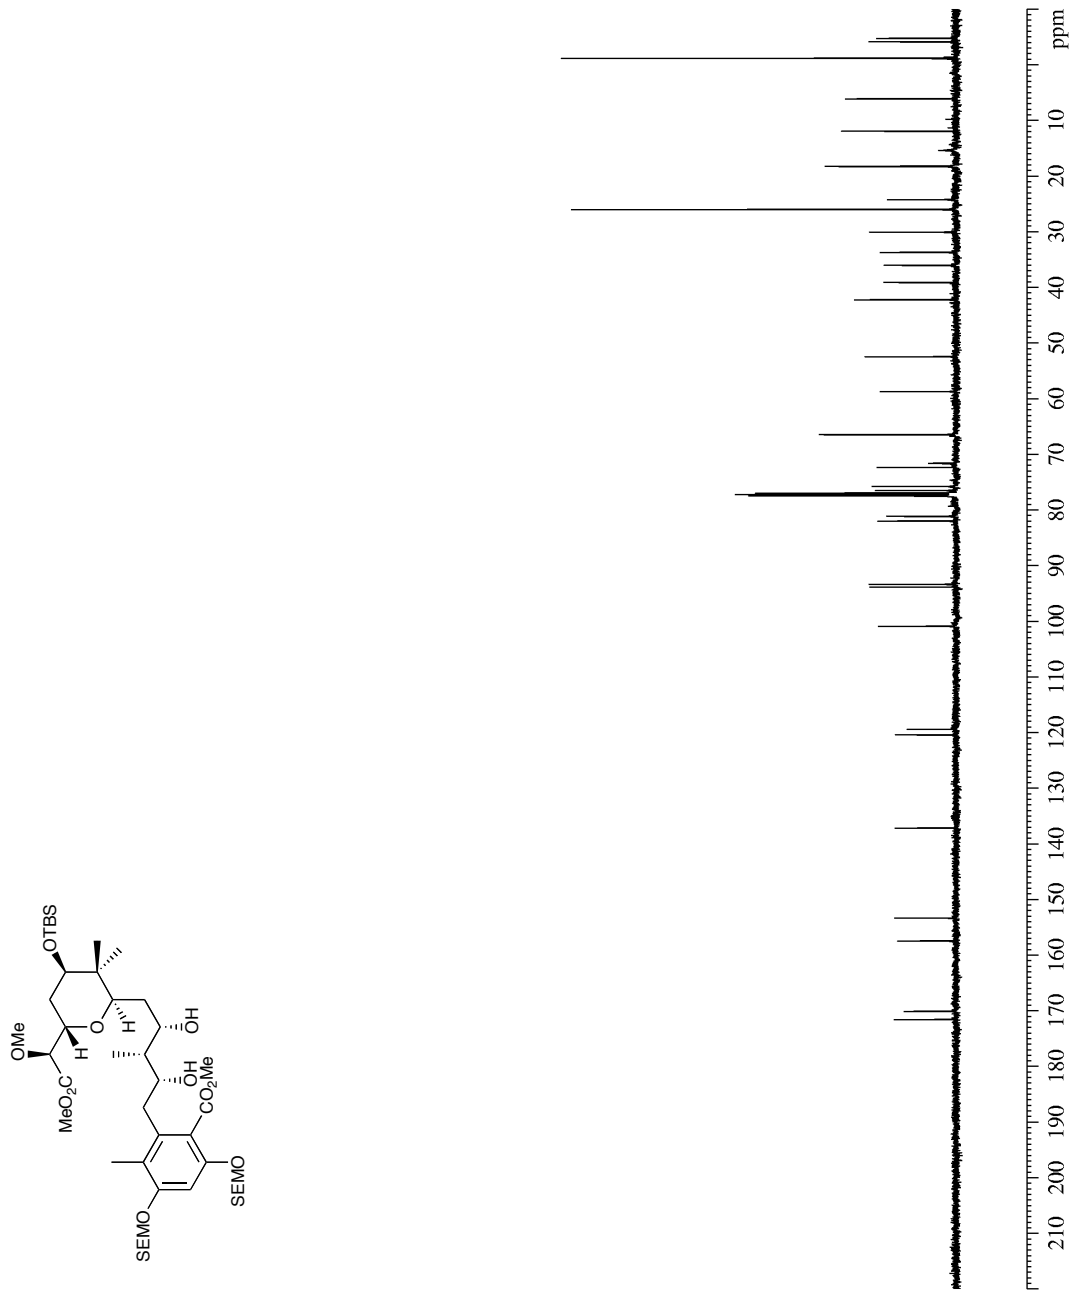

**Figure 44.** The  $^{13}\text{C}$  NMR Spectrum of Compound (+)-S8 in  $\text{CDCl}_3$

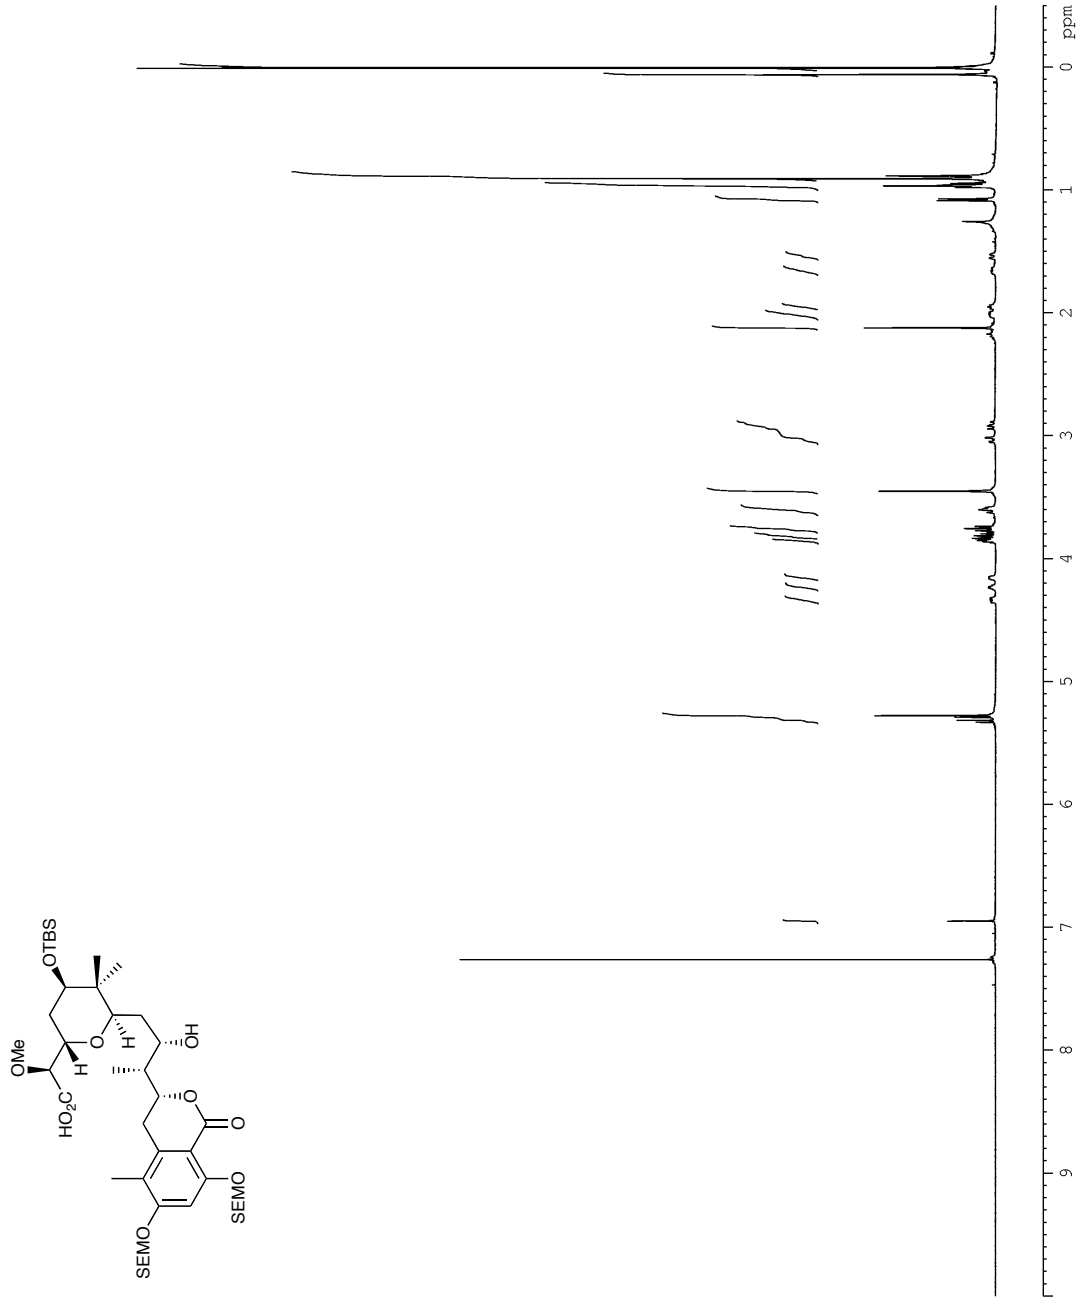

**Figure 45.** The <sup>1</sup>H NMR Spectrum of Compound (+)-25 in CDCl<sub>3</sub>

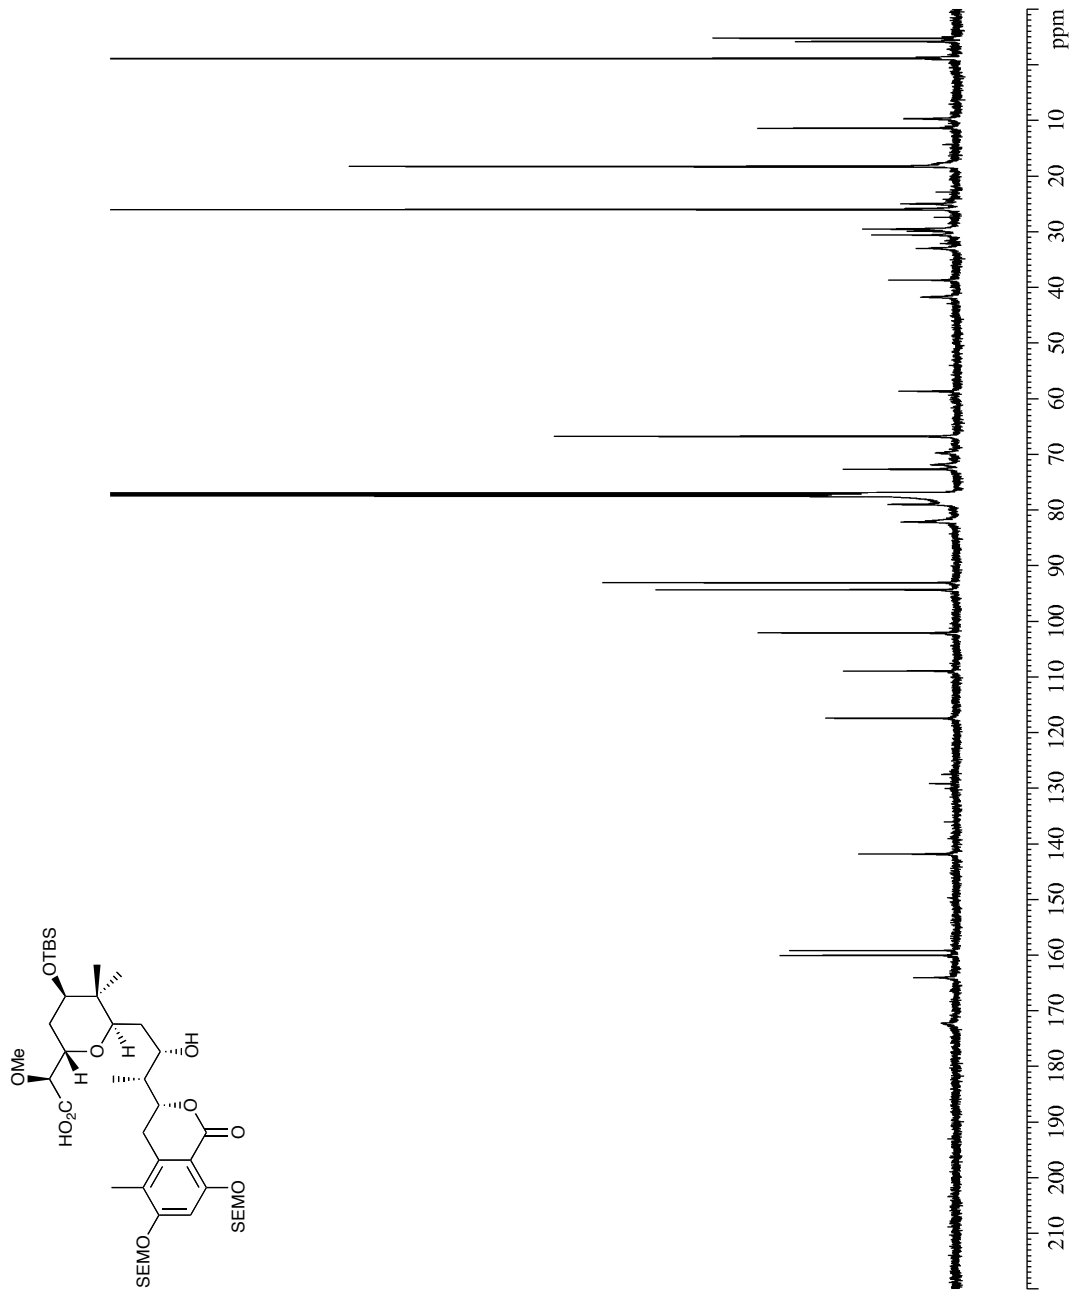

**Figure 46.** The  $^{13}\text{C}$  NMR Spectrum of Compound (+)-25 in  $\text{CDCl}_3$ .

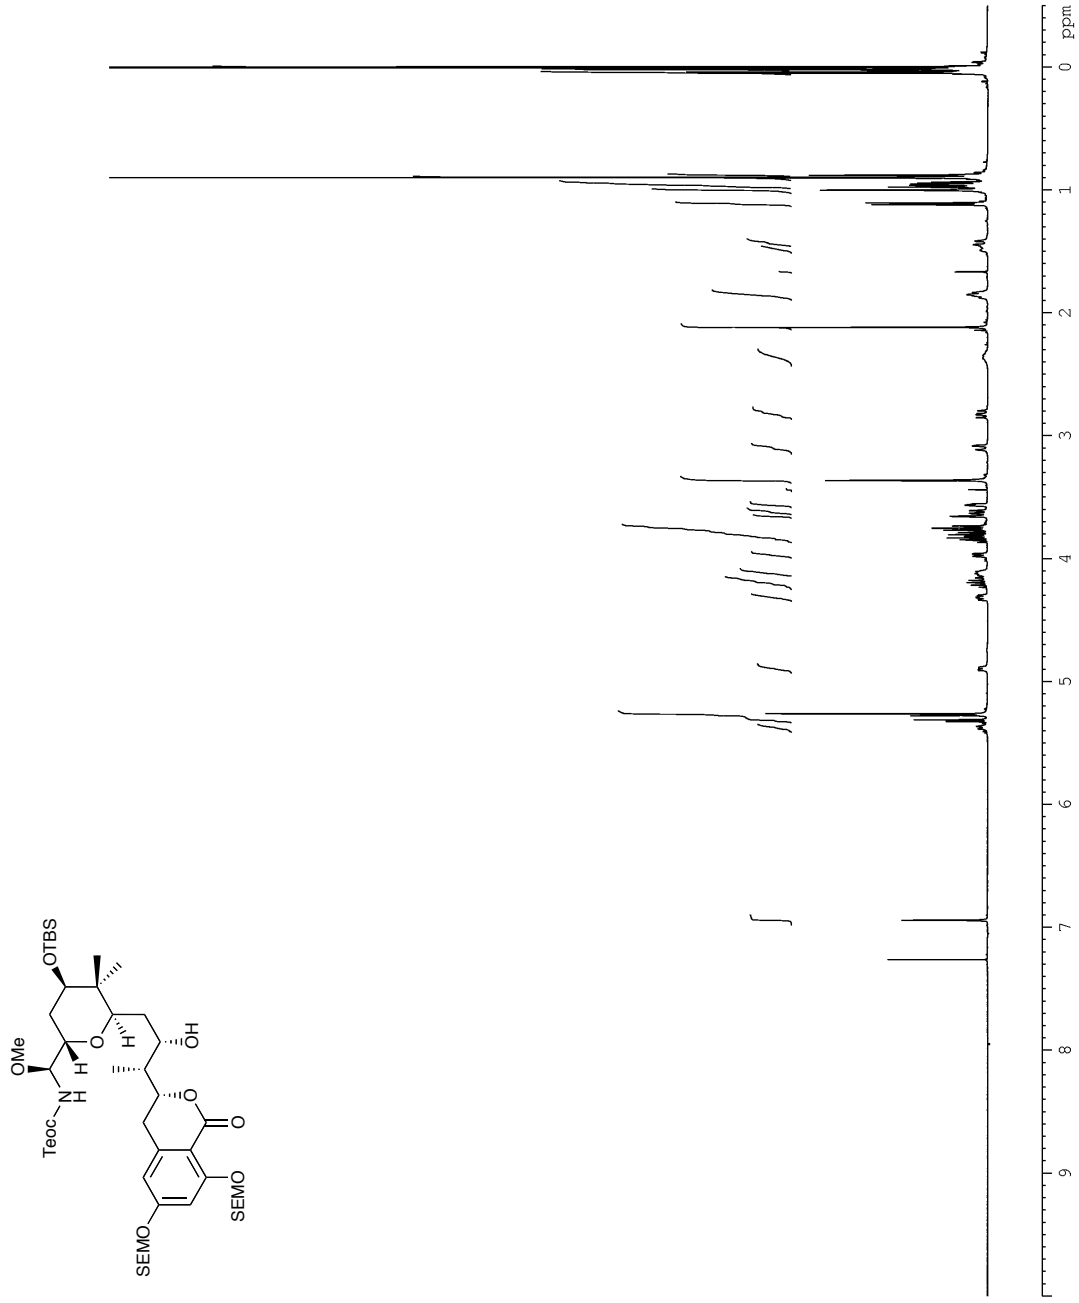

**Figure 47.** The <sup>1</sup>H NMR Spectrum of Compound (+)-S9 in CDCl<sub>3</sub>

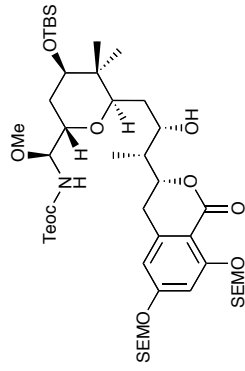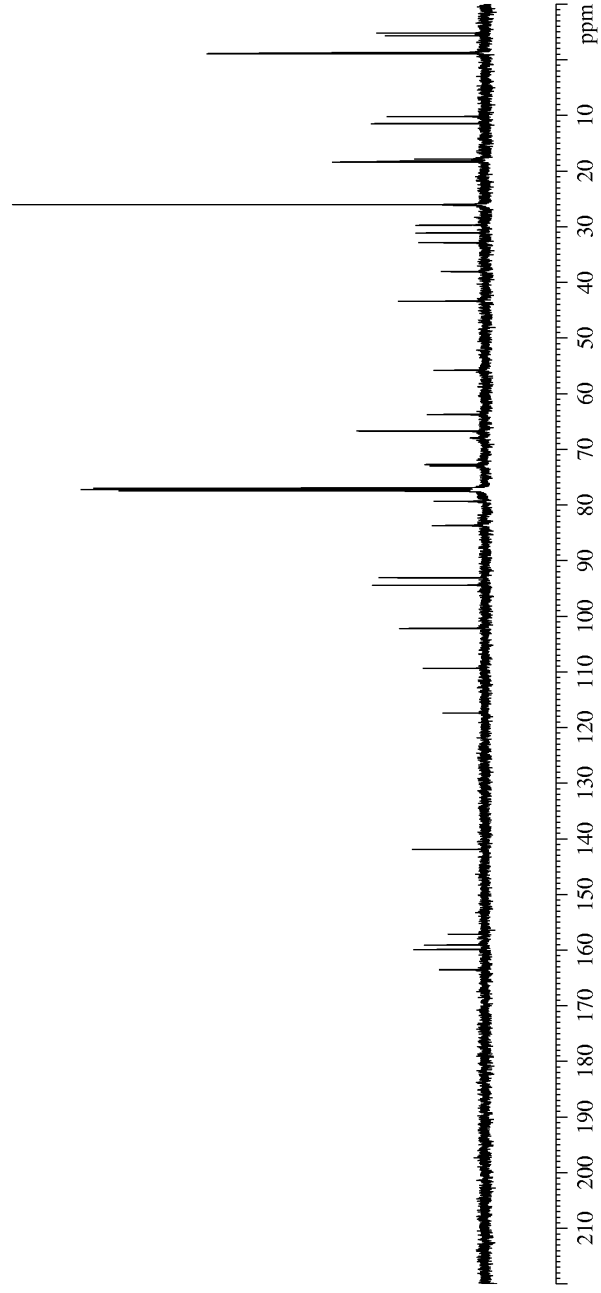

**Figure 48.** The  $^{13}\text{C}$  NMR Spectrum of Compound (+)-S9 in  $\text{CDCl}_3$



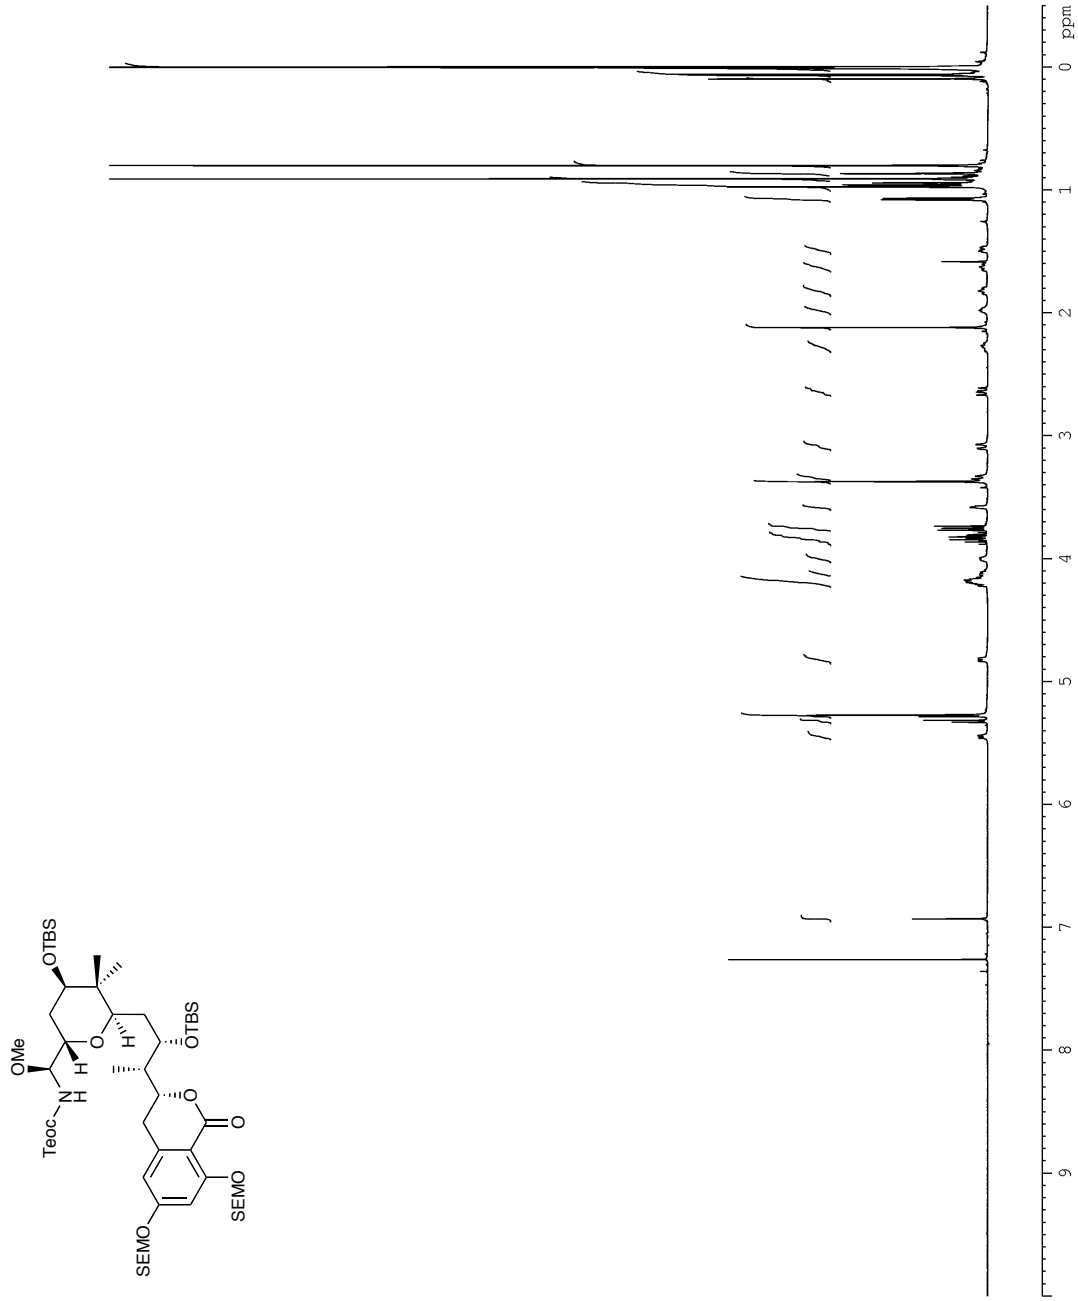

**Figure 49.** The <sup>1</sup>H NMR Spectrum of Compound (+)-3 in CDCl<sub>3</sub>

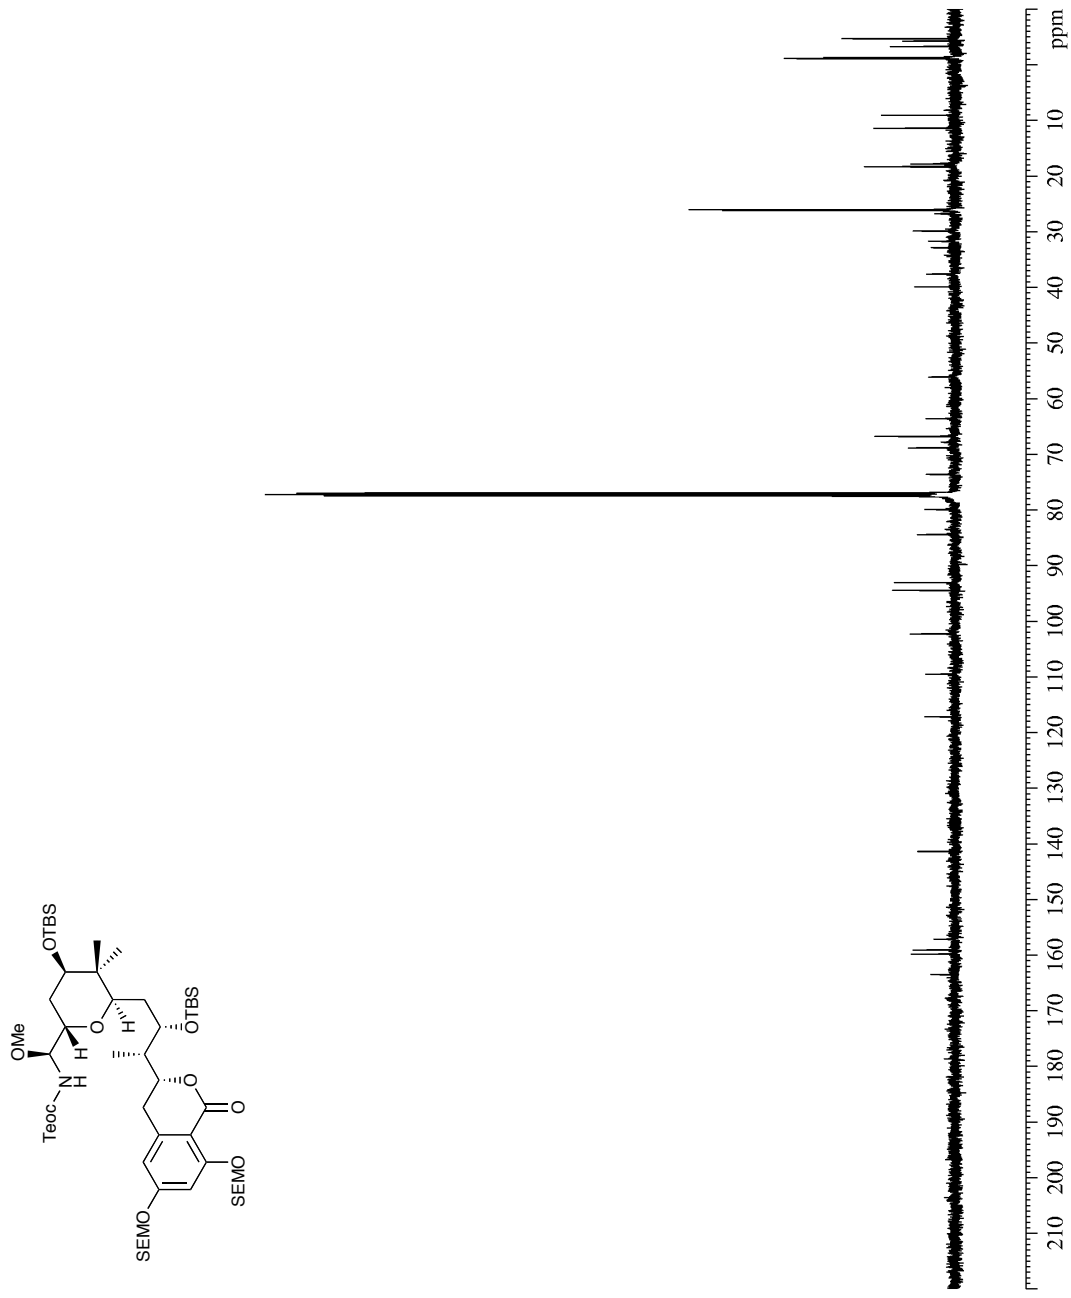

**Figure 50.** The  $^{13}\text{C}$  NMR Spectrum of Compound (+)-3 in  $\text{CDCl}_3$

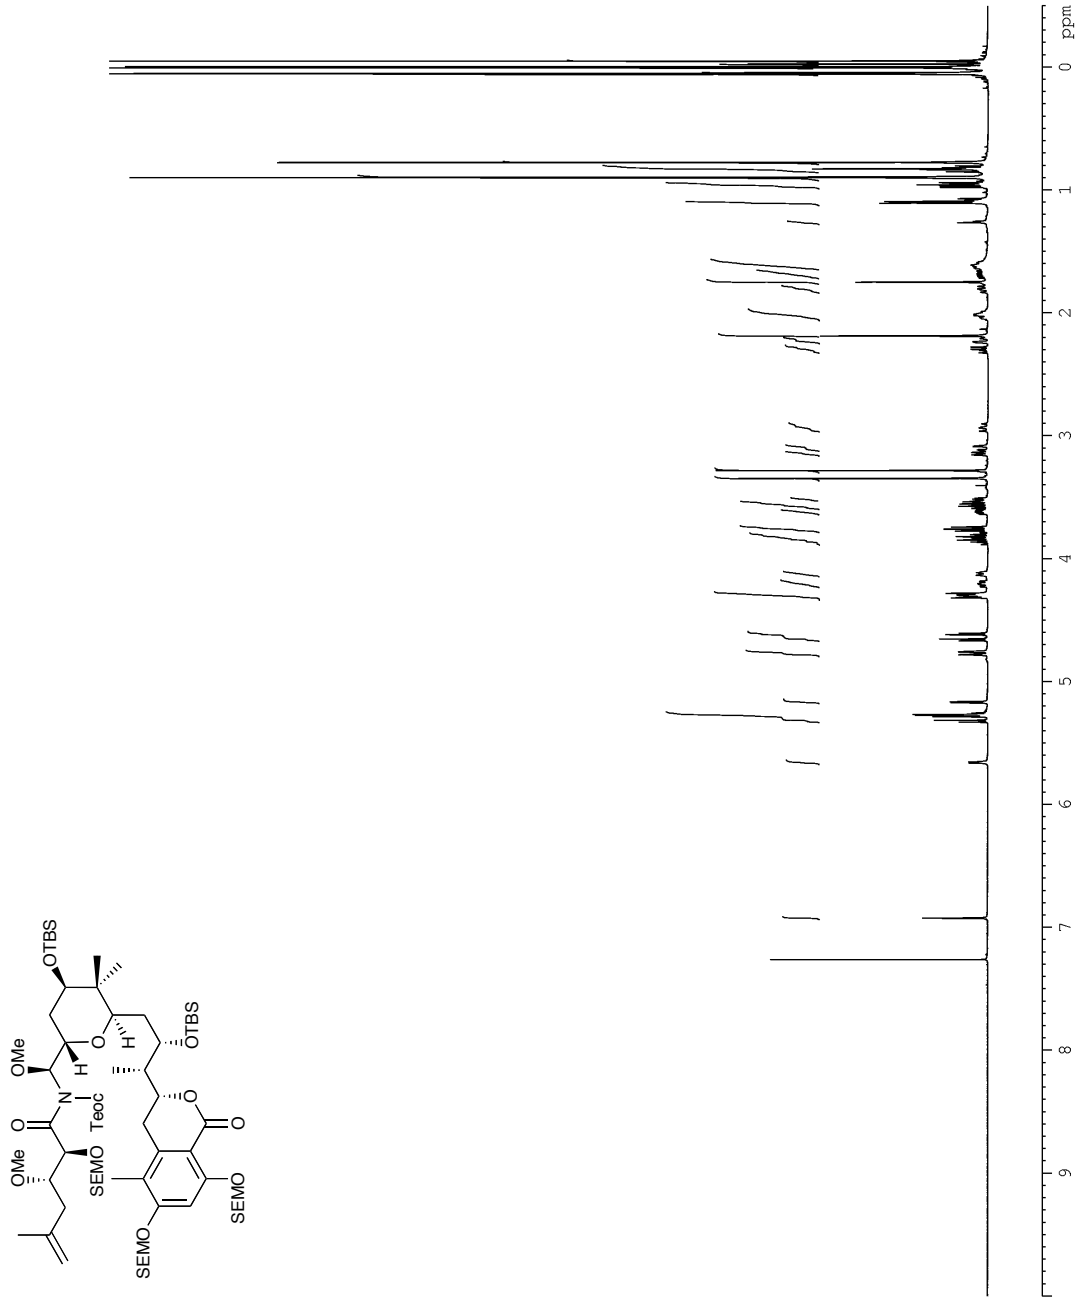

**Figure 51.** The <sup>1</sup>H NMR Spectrum of Compound (+)-27 in CDCl<sub>3</sub>



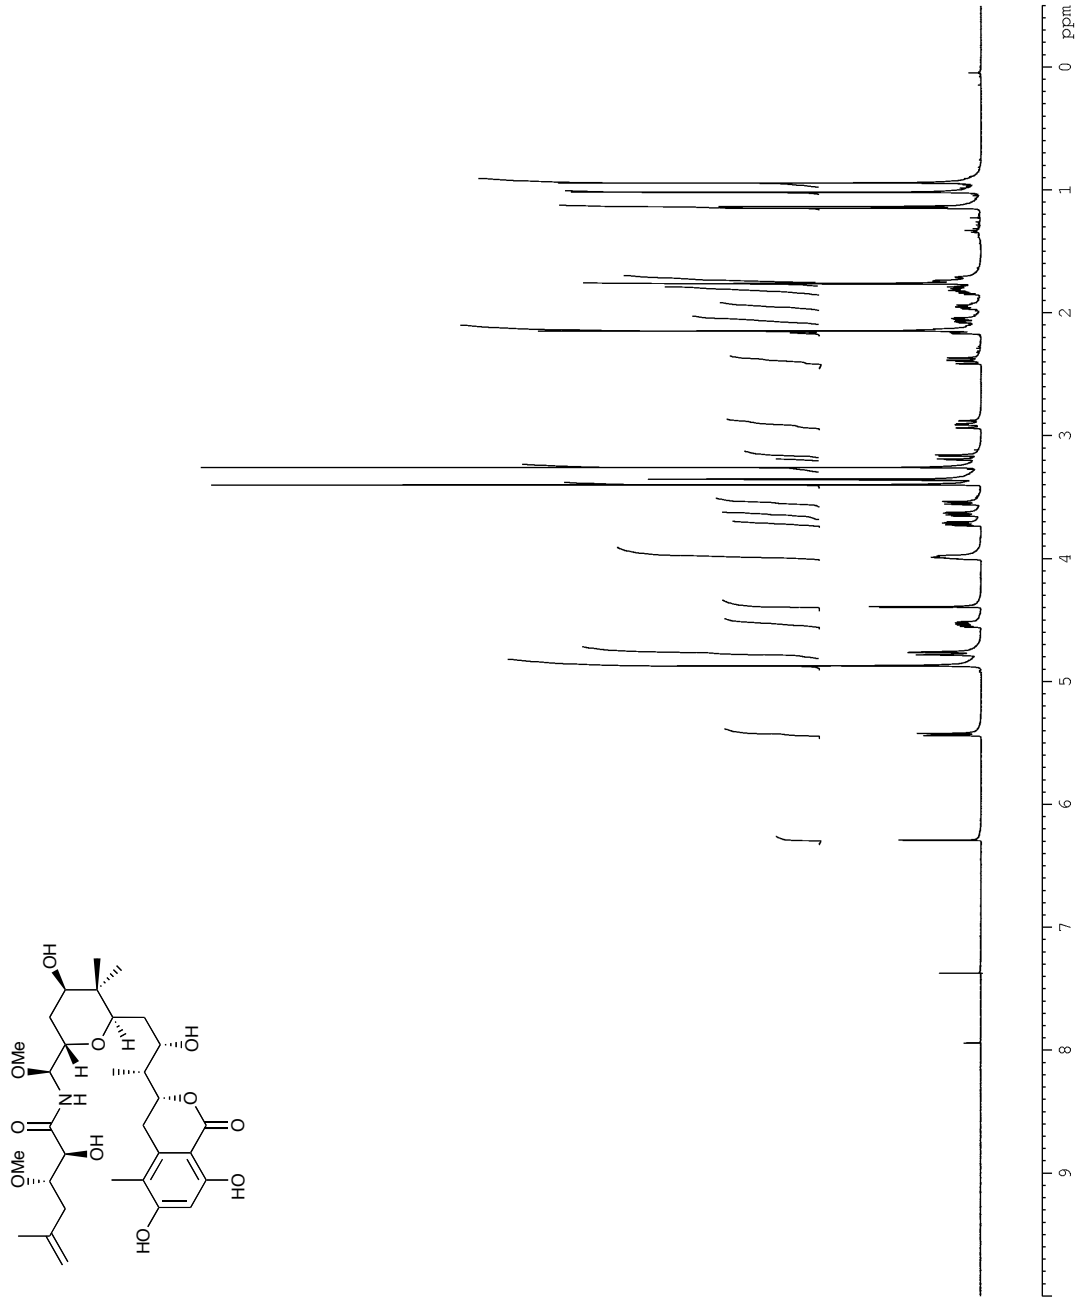

**Figure 53.** The  $^1\text{H}$  NMR Spectrum of Compound (+)-1 in  $\text{CD}_3\text{OD}$

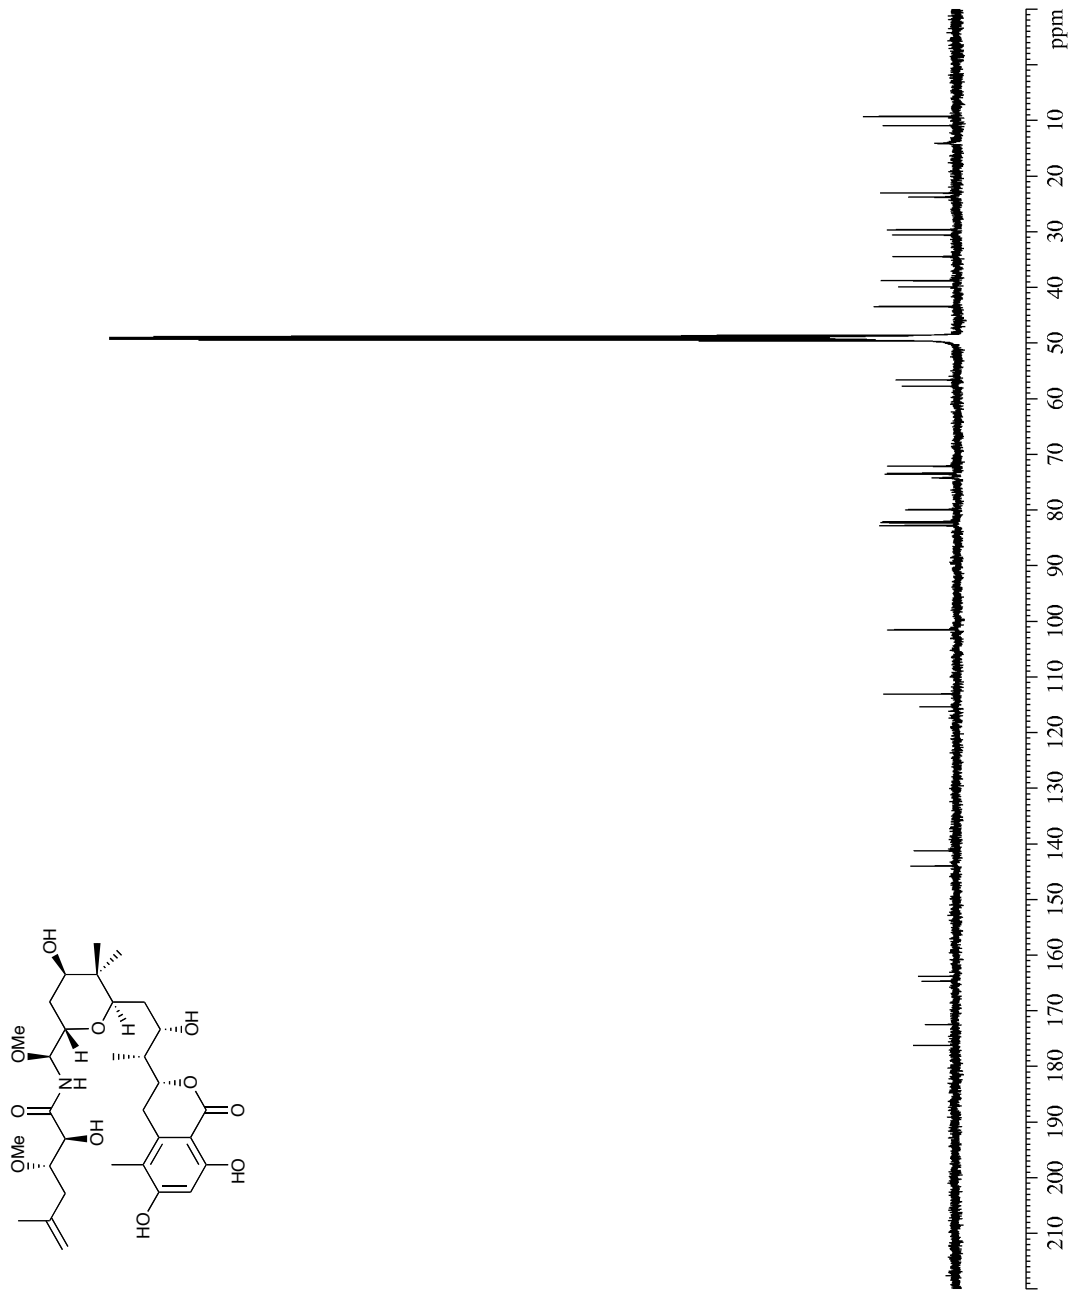

**Figure 54.** The  $^{13}\text{C}$  NMR Spectrum of Compound (+)-1 in  $\text{CD}_3\text{OD}$
